# Supplementary material for: The biosonar of the boto: evidence of differences among species of river dolphins (Inia spp.) from the Amazon
Source: PeerJ. 2021 Apr 22;9:e11105. doi: 10.7717/peerj.11105 (PMC8071073; doi:10.7717/peerj.11105)
Supplement: Supplemental Information 2 [file peerj-09-11105-s002.xlsx]

## Sheet: Inia_clicks
Sp	Fp	10BW	3BW	ICI	Location
I. araguaiaensis	43120	16767	11404	61.9325	Araguaia River
I. araguaiaensis	43408	16745	11276	58.34	Araguaia River
I. araguaiaensis	60006	16915	12317	66.41	Araguaia River
I. araguaiaensis	43118	15522	9921	53.905	Araguaia River
I. araguaiaensis	42718	15899	10751	40.5325	Araguaia River
I. araguaiaensis	42130	14841	9410		Araguaia River
I. araguaiaensis	44419	94347	63691	55.2575	Araguaia River
I. araguaiaensis	50145	98605	63876	40.2075	Araguaia River
I. araguaiaensis	84248	105853	66827	29.57	Araguaia River
I. araguaiaensis	43923	91768	63009		Araguaia River
I. araguaiaensis	47313	97704	36802	35.9725	Araguaia River
I. araguaiaensis	47473	104456	35408	39.3025	Araguaia River
I. araguaiaensis	47265	101098	53113	36.6375	Araguaia River
I. araguaiaensis	80926	98121	64511	37.98	Araguaia River
I. araguaiaensis	80422	96063	62933	39.7875	Araguaia River
I. araguaiaensis	86613	96317	65586	37.61	Araguaia River
I. araguaiaensis	97101	108849	66323	37.37	Araguaia River
I. araguaiaensis	52146	105022	65981	40.8175	Araguaia River
I. araguaiaensis	50322	103544	60040	48.3475	Araguaia River
I. araguaiaensis	49969	98222	55049	62.6825	Araguaia River
I. araguaiaensis	84165	98662	67495	42.1425	Araguaia River
I. araguaiaensis	47421	97040	73254	51.09	Araguaia River
I. araguaiaensis	47709	101866	72473	36.8175	Araguaia River
I. araguaiaensis	48322	109631	72884	36.5175	Araguaia River
I. araguaiaensis	57054	109524	49260	39.32	Araguaia River
I. araguaiaensis	55164	107343	48862	42.2375	Araguaia River
I. araguaiaensis	50432	106949	47011		Araguaia River
I. araguaiaensis	48225	96814	63954		Araguaia River
I. araguaiaensis	46792	95002	60390		Araguaia River
I. araguaiaensis	46570	96074	49604	47.4975	Araguaia River
I. araguaiaensis	45650	96040	50268	40.625	Araguaia River
I. araguaiaensis	58314	98321	54951	41.5375	Araguaia River
I. araguaiaensis	60938	97478	66172	41.095	Araguaia River
I. araguaiaensis	51843	103493	72604	34.5675	Araguaia River
I. araguaiaensis	51492	125538	68112	33.585	Araguaia River
I. araguaiaensis	50347	111730	67768	28.335	Araguaia River
I. araguaiaensis	49778	112257	66529	30.4725	Araguaia River
I. araguaiaensis	49607	110274	66695	32.4575	Araguaia River
I. araguaiaensis	49174	110991	70017	33.0075	Araguaia River
I. araguaiaensis	48102	105783	71177	31.485	Araguaia River
I. araguaiaensis	48054	107855	72505	31.5075	Araguaia River
I. araguaiaensis	47864	109695	74109	28.765	Araguaia River
I. araguaiaensis	48361	109711	75645	33.06	Araguaia River
I. araguaiaensis	59025	52494	7280	28.4125	Araguaia River
I. araguaiaensis	52783	109941	71792	27.2575	Araguaia River
I. araguaiaensis	52908	109055	69924	27.22	Araguaia River
I. araguaiaensis	52068	92415	67510	25.9675	Araguaia River
I. araguaiaensis	52190	94884	66765	24.9275	Araguaia River
I. araguaiaensis	52235	92603	66445	24.1575	Araguaia River
I. araguaiaensis	50359	92806	66939	25.04	Araguaia River
I. araguaiaensis	50198	92837	66923	27.285	Araguaia River
I. araguaiaensis	59216	50739	7396	67.45	Araguaia River
I. araguaiaensis	51336	85242	64874	65.0225	Araguaia River
I. araguaiaensis	51139	87263	56774		Araguaia River
I. araguaiaensis	47390	94946	66274	34.6375	Araguaia River
I. araguaiaensis	49385	93158	63849	41.23	Araguaia River
I. araguaiaensis	48667	91343	64121	36.3475	Araguaia River
I. araguaiaensis	40802	97975	70237	36.6375	Araguaia River
I. araguaiaensis	49539	95211	62908	35.0625	Araguaia River
I. araguaiaensis	41672	92735	65070	35.2675	Araguaia River
I. araguaiaensis	60424	91088	64223	35.2075	Araguaia River
I. araguaiaensis	57965	96916	59277	38.82	Araguaia River
I. araguaiaensis	58288	88506	59203	38.83	Araguaia River
I. araguaiaensis	57249	87262	54994	35.75	Araguaia River
I. araguaiaensis	56854	92818	55380	37.67	Araguaia River
I. araguaiaensis	54602	92644	53173	40.59	Araguaia River
I. araguaiaensis	42483	95629	53140	42.015	Araguaia River
I. araguaiaensis	50640	90137	49146	37.9525	Araguaia River
I. araguaiaensis	48413	95933	36958	42.19	Araguaia River
I. araguaiaensis	50034	87460	56623	42.4425	Araguaia River
I. araguaiaensis	48535	91876	56099	40.135	Araguaia River
I. araguaiaensis	48834	91542	60342	39.5175	Araguaia River
I. araguaiaensis	49741	100750	57314	41.0425	Araguaia River
I. araguaiaensis	49185	88371	58953	47.715	Araguaia River
I. araguaiaensis	49838	91528	62247	44.025	Araguaia River
I. araguaiaensis	56553	96598	63674	41.9225	Araguaia River
I. araguaiaensis	56232	96790	63800	50.2775	Araguaia River
I. araguaiaensis	53096	100725	65955	53.305	Araguaia River
I. araguaiaensis	67056	93763	65680		Araguaia River
I. araguaiaensis	55053	85077	46272	32.9075	Araguaia River
I. araguaiaensis	50908	24329	7936	39.65	Araguaia River
I. araguaiaensis	51459	53353	8033	40.255	Araguaia River
I. araguaiaensis	51942	24055	7922	34.36	Araguaia River
I. araguaiaensis	52317	24709	7983	33.85	Araguaia River
I. araguaiaensis	52847	24689	7808	36.8775	Araguaia River
I. araguaiaensis	53334	11734	8129	34.6125	Araguaia River
I. araguaiaensis	53666	24634	8218	42.02	Araguaia River
I. araguaiaensis	54120	12165	8244	35.86	Araguaia River
I. araguaiaensis	54612	11642	8094	39.0425	Araguaia River
I. araguaiaensis	54924	59493	8350	40.13	Araguaia River
I. araguaiaensis	55558	25232	8341	33.755	Araguaia River
I. araguaiaensis	55932	60371	8331	39.59	Araguaia River
I. araguaiaensis	56291	12099	8291	35.6325	Araguaia River
I. araguaiaensis	56823	11902	8377	34.615	Araguaia River
I. araguaiaensis	57433	12265	8385	30.3075	Araguaia River
I. araguaiaensis	45107	25812	9273	32.095	Araguaia River
I. araguaiaensis	45534	32130	9157	32.28	Araguaia River
I. araguaiaensis	45813	13355	9031	35.065	Araguaia River
I. araguaiaensis	59312	12290	8537	45.8625	Araguaia River
I. araguaiaensis	47254	33826	9000	62.5725	Araguaia River
I. araguaiaensis	48339	42231	9004		Araguaia River
I. araguaiaensis	62933	86542	37202	27.295	Araguaia River
I. araguaiaensis	62043	86396	37321		Araguaia River
I. araguaiaensis	39371	87448	44565		Araguaia River
I. araguaiaensis	49738	79304	30739	28.0975	Araguaia River
I. araguaiaensis	49496	73972	29895	60.065	Araguaia River
I. araguaiaensis	49050	72319	30732	60.3975	Araguaia River
I. araguaiaensis	47837	91049	48599	28.9475	Araguaia River
I. araguaiaensis	57087	88289	46093	27.98	Araguaia River
I. araguaiaensis	56168	90681	43838	35.2	Araguaia River
I. araguaiaensis	55828	90876	39378	27.3025	Araguaia River
I. araguaiaensis	55408	91473	38254	29.605	Araguaia River
I. araguaiaensis	55419	91104	36315	28.6625	Araguaia River
I. araguaiaensis	55123	91203	35541	31.9975	Araguaia River
I. araguaiaensis	55598	85897	36832	33.15	Araguaia River
I. araguaiaensis	55819	82505	35899	30.68	Araguaia River
I. araguaiaensis	56033	92342	36025	28.6775	Araguaia River
I. araguaiaensis	48941	94361	35106	32.335	Araguaia River
I. araguaiaensis	49987	91590	36939	28.175	Araguaia River
I. araguaiaensis	49024	93104	34469	30.8475	Araguaia River
I. araguaiaensis	50112	72850	34989	33.8475	Araguaia River
I. araguaiaensis	49386	68095	33569	27.0125	Araguaia River
I. araguaiaensis	48964	66070	32814	31.125	Araguaia River
I. araguaiaensis	47899	64588	32680	32.04	Araguaia River
I. araguaiaensis	49405	65346	52924		Araguaia River
I. araguaiaensis	57120	59889	36662	48.97	Araguaia River
I. araguaiaensis	52419	88384	29954	25.0225	Araguaia River
I. araguaiaensis	49923	116619	48676	27.245	Araguaia River
I. araguaiaensis	51470	87342	47290	23.3225	Araguaia River
I. araguaiaensis	74319	100748	48138	26.245	Araguaia River
I. araguaiaensis	50133	93571	47788	29.5025	Araguaia River
I. araguaiaensis	47162	90963	46824	28.6925	Araguaia River
I. araguaiaensis	66909	81612	64513	24.765	Araguaia River
I. araguaiaensis	69725	78886	62470	29.64	Araguaia River
I. araguaiaensis	39940	74734	59272	31.1925	Araguaia River
I. araguaiaensis	62597	73622	55650	33.2775	Araguaia River
I. araguaiaensis	39994	71774	52970	38.235	Araguaia River
I. araguaiaensis	57429	67366	49975		Araguaia River
I. araguaiaensis	48216	111790	32829	65.36	Araguaia River
I. araguaiaensis	92979	99451	30201	24.5375	Araguaia River
I. araguaiaensis	91011	92916	29366	51.8075	Araguaia River
I. araguaiaensis	88226	78865	33095	24.735	Araguaia River
I. araguaiaensis	87287	77142	65453	22.555	Araguaia River
I. araguaiaensis	86634	91604	67509	25.52	Araguaia River
I. araguaiaensis	68838	91790	64802	30.9475	Araguaia River
I. araguaiaensis	67523	87986	57738	24.8425	Araguaia River
I. araguaiaensis	66329	73457	51856	27.0675	Araguaia River
I. araguaiaensis	66257	69127	50787	28.1925	Araguaia River
I. araguaiaensis	65376	66375	48568	31.505	Araguaia River
I. araguaiaensis	50997	64303	46867	26.125	Araguaia River
I. araguaiaensis	50996	64856	45753	31.1925	Araguaia River
I. araguaiaensis	49622	87382	43631	38.1475	Araguaia River
I. araguaiaensis	47947	86812	41197	45.4875	Araguaia River
I. araguaiaensis	46571	84788	46186	32.225	Araguaia River
I. araguaiaensis	46568	85093	45709	36.55	Araguaia River
I. araguaiaensis	45847	81747	44373	31.165	Araguaia River
I. araguaiaensis	45588	82190	43695	29.82	Araguaia River
I. araguaiaensis	45138	80830	41947	27.5025	Araguaia River
I. araguaiaensis	44987	81388	40600	24.1675	Araguaia River
I. araguaiaensis	56102	81033	39982	26.56	Araguaia River
I. araguaiaensis	44621	74950	37958	29.09	Araguaia River
I. araguaiaensis	43078	77843	35710	58.9575	Araguaia River
I. araguaiaensis	41701	83960	34002		Araguaia River
I. araguaiaensis	44991	74215	19664	43.45	Araguaia River
I. araguaiaensis	43656	66693	21344	43.0325	Araguaia River
I. araguaiaensis	66326	82182	20737	31.3175	Araguaia River
I. araguaiaensis	66194	80710	23269	29.865	Araguaia River
I. araguaiaensis	65507	113357	47787	35.2525	Araguaia River
I. araguaiaensis	75709	76068	34682	29.04	Araguaia River
I. araguaiaensis	75476	74964	33414	27.635	Araguaia River
I. araguaiaensis	59434	103818	31290	28.695	Araguaia River
I. araguaiaensis	59211	102303	30460	31.41	Araguaia River
I. araguaiaensis	58926	68187	47496	40.9525	Araguaia River
I. araguaiaensis	59665	56272	47382	31.1925	Araguaia River
I. araguaiaensis	59718	56228	45423	29.84	Araguaia River
I. araguaiaensis	59459	64773	40201	32.4475	Araguaia River
I. araguaiaensis	58256	64168	36904	31.4	Araguaia River
I. araguaiaensis	56829	75705	33727	28.7325	Araguaia River
I. araguaiaensis	55038	82893	31713	28.6625	Araguaia River
I. araguaiaensis	53874	85743	32984	28.115	Araguaia River
I. araguaiaensis	52824	87185	30103	31.445	Araguaia River
I. araguaiaensis	51235	85848	30302	36.6375	Araguaia River
I. araguaiaensis	49218	82459	18784	33.9325	Araguaia River
I. araguaiaensis	48064	78079	16862	40.705	Araguaia River
I. araguaiaensis	71377	79466	33982	38.67	Araguaia River
I. araguaiaensis	69980	71837	29158	36.055	Araguaia River
I. araguaiaensis	69296	89978	29529	36.2125	Araguaia River
I. araguaiaensis	44492	89241	43906	36.4575	Araguaia River
I. araguaiaensis	56139	96822	41295	35.42	Araguaia River
I. araguaiaensis	56712	123775	30146	61.5475	Araguaia River
I. araguaiaensis	48933	83530	42614	43.46	Araguaia River
I. araguaiaensis	55190	89499	27478	50.6675	Araguaia River
I. araguaiaensis	78690	89650	12714	46.0575	Araguaia River
I. araguaiaensis	76960	42481	13699	34.6675	Araguaia River
I. araguaiaensis	49128	36689	16989	39.58	Araguaia River
I. araguaiaensis	48370	98316	23081	42.3	Araguaia River
I. araguaiaensis	47636	74139	15359	48.7825	Araguaia River
I. araguaiaensis	46805	71625	14402	42.165	Araguaia River
I. araguaiaensis	45138	67891	15448	30.6375	Araguaia River
I. araguaiaensis	67976	83633	38158	27.64	Araguaia River
I. araguaiaensis	67679	81546	42461	26.5675	Araguaia River
I. araguaiaensis	42315	79059	43876	32.6375	Araguaia River
I. araguaiaensis	41148	77796	40541	32.25	Araguaia River
I. araguaiaensis	40713	67213	37764	39.36	Araguaia River
I. araguaiaensis	40179	64375	35170	41.685	Araguaia River
I. araguaiaensis	39776	53474	29987	53.0925	Araguaia River
I. araguaiaensis	54328	52171	31331	58.7375	Araguaia River
I. araguaiaensis	48809	56603	28372	35.575	Araguaia River
I. araguaiaensis	48398	57566	28444	45.785	Araguaia River
I. araguaiaensis	47400	56718	18787	36.27	Araguaia River
I. araguaiaensis	46500	55499	18383	49.0775	Araguaia River
I. araguaiaensis	46346	57674	19300	50.7775	Araguaia River
I. araguaiaensis	45388	55690	21491	78.8325	Araguaia River
I. araguaiaensis	44252	66242	20129	81.5725	Araguaia River
I. araguaiaensis	44907	38707	18718	60.19	Araguaia River
I. araguaiaensis	43802	78268	17042	39.3425	Araguaia River
I. araguaiaensis	57932	91895	67536	32.5375	Araguaia River
I. araguaiaensis	88103	73476	63464	33.185	Araguaia River
I. araguaiaensis	87515	71066	43062	32.055	Araguaia River
I. araguaiaensis	66127	70421	42583	35.2075	Araguaia River
I. araguaiaensis	66451	87337	42469	44.5475	Araguaia River
I. araguaiaensis	66433	84723	42322	42.2775	Araguaia River
I. araguaiaensis	66183	85141	40808	18.4	Araguaia River
I. araguaiaensis	77279	105130	52285	31.295	Araguaia River
I. araguaiaensis	50945	83848	39082	7.15	Araguaia River
I. araguaiaensis	46449	96065	65160	27.8975	Araguaia River
I. araguaiaensis	49624	84140	38064	23.8275	Araguaia River
I. araguaiaensis	45383	79114	18844	12.2325	Araguaia River
I. araguaiaensis	47682	81736	17158	21.425	Araguaia River
I. araguaiaensis	44311	78004	18417	13.0675	Araguaia River
I. araguaiaensis	47242	72594	17375	24.1725	Araguaia River
I. araguaiaensis	43607	83793	17048	14.645	Araguaia River
I. araguaiaensis	46782	67985	16276	24.385	Araguaia River
I. araguaiaensis	42707	57756	15136	14.0075	Araguaia River
I. araguaiaensis	45659	65132	15766	28.8275	Araguaia River
I. araguaiaensis	42270	59376	15213	33.66	Araguaia River
I. araguaiaensis	44943	63778	15963	14.605	Araguaia River
I. araguaiaensis	40949	59074	29947	76.71	Araguaia River
I. araguaiaensis	41975	82652	31104	94.225	Araguaia River
I. araguaiaensis	46328	61560	22037	30.555	Araguaia River
I. araguaiaensis	37699	75362	58785	37.135	Araguaia River
I. araguaiaensis	63640	90693	56516	48.8325	Araguaia River
I. araguaiaensis	47566	80580	18072	19.415	Araguaia River
I. araguaiaensis	43124	56841	15593	32.8675	Araguaia River
I. araguaiaensis	47891	72925	32654	20.095	Araguaia River
I. araguaiaensis	42300	50701	12713	42.9125	Araguaia River
I. araguaiaensis	46935	52730	34481	18.335	Araguaia River
I. araguaiaensis	41473	58492	22030	39.715	Araguaia River
I. araguaiaensis	45104	66058	35620	35.215	Araguaia River
I. araguaiaensis	39441	61071	22434	63.37	Araguaia River
I. araguaiaensis	43480	87293	20997	69.5325	Araguaia River
I. araguaiaensis	74350	83175	55327	47.9775	Araguaia River
I. araguaiaensis	73552	90942	21129	28.81	Araguaia River
I. araguaiaensis	72363	90798	20076	30.7725	Araguaia River
I. araguaiaensis	71312	88722	17728	31.1	Araguaia River
I. araguaiaensis	70097	88203	17991	35.8775	Araguaia River
I. araguaiaensis	68865	89413	18072	32.7	Araguaia River
I. araguaiaensis	67690	91852	18539	38.385	Araguaia River
I. araguaiaensis	45966	55621	19630	35.1675	Araguaia River
I. araguaiaensis	46394	55129	17939	38.675	Araguaia River
I. araguaiaensis	46354	92135	14369	31.7675	Araguaia River
I. araguaiaensis	60779	67402	27447	38.6075	Araguaia River
I. araguaiaensis	45092	63107	26677	38.4175	Araguaia River
I. araguaiaensis	57321	84528	25356	39.625	Araguaia River
I. araguaiaensis	55793	88169	50309	41.4175	Araguaia River
I. araguaiaensis	53999	86949	50568	40.5675	Araguaia River
I. araguaiaensis	52543	85466	34317	42.3375	Araguaia River
I. araguaiaensis	39785	82177	25134	37.6825	Araguaia River
I. araguaiaensis	50059	80587	23736	38.655	Araguaia River
I. araguaiaensis	49053	61520	21328	40.7275	Araguaia River
I. araguaiaensis	47986	61238	19917	41.9775	Araguaia River
I. araguaiaensis	48029	60463	19435	42.4825	Araguaia River
I. araguaiaensis	47136	75382	37752	49.9725	Araguaia River
I. araguaiaensis	65212	70514	37766	39.715	Araguaia River
I. araguaiaensis	63106	80113	44066	57.7575	Araguaia River
I. araguaiaensis	59905	71477	51929		Araguaia River
I. araguaiaensis	47099	75285	20629		Araguaia River
I. araguaiaensis	45760	95672	47368		Araguaia River
I. araguaiaensis	44298	99654	31721		Araguaia River
I. araguaiaensis	55930	106711	76749		Araguaia River
I. araguaiaensis	40371	112752	56368		Araguaia River
I. araguaiaensis	39486	109068	35777		Araguaia River
I. araguaiaensis	44330	53612	26404		Araguaia River
I. araguaiaensis	38673	59892	33792		Araguaia River
I. araguaiaensis	54136	70264	32172		Araguaia River
I. araguaiaensis	38464	59088	30007		Araguaia River
I. araguaiaensis	53482	71713	32277		Araguaia River
I. araguaiaensis	38396	58432	30215		Araguaia River
I. araguaiaensis	38601	58724	37124		Araguaia River
I. araguaiaensis	83443	82600	19748		Araguaia River
I. araguaiaensis	48799	56618	36174		Araguaia River
I. araguaiaensis	47910	55535	35394		Araguaia River
I. araguaiaensis	58331	85998	29047		Araguaia River
I. araguaiaensis	49107	55352	32653		Araguaia River
I. araguaiaensis	57584	85144	29575		Araguaia River
I. araguaiaensis	49119	54831	27525		Araguaia River
I. araguaiaensis	56734	84476	29113		Araguaia River
I. araguaiaensis	45269	54190	28017		Araguaia River
I. araguaiaensis	45881	90077	28245		Araguaia River
I. araguaiaensis	36089	50635	25069		Araguaia River
I. araguaiaensis	54896	86466	27536		Araguaia River
I. araguaiaensis	48525	86437	27675		Araguaia River
I. araguaiaensis	48459	70810	35996		Araguaia River
I. araguaiaensis	48544	72808	35692		Araguaia River
I. araguaiaensis	48337	81631	35352		Araguaia River
I. araguaiaensis	47953	80029	34013		Araguaia River
I. araguaiaensis	38081	71215	28290		Araguaia River
I. araguaiaensis	47494	76488	33644		Araguaia River
I. araguaiaensis	38872	50823	24595		Araguaia River
I. araguaiaensis	47197	75763	35552		Araguaia River
I. araguaiaensis	39238	55111	26525		Araguaia River
I. araguaiaensis	47459	75699	39825		Araguaia River
I. araguaiaensis	38527	54380	28690		Araguaia River
I. araguaiaensis	46513	79828	41818		Araguaia River
I. araguaiaensis	38730	74448	24473		Araguaia River
I. araguaiaensis	65033	79194	40123		Araguaia River
I. araguaiaensis	66955	88035	40285		Araguaia River
I. araguaiaensis	62318	90790	40583		Araguaia River
I. araguaiaensis	60148	92675	41217		Araguaia River
I. araguaiaensis	57749	82797	40027		Araguaia River
I. araguaiaensis	56076	76932	28378		Araguaia River
I. araguaiaensis	54649	81045	25861		Araguaia River
I. araguaiaensis	53339	36165	23237		Araguaia River
I. araguaiaensis	52494	33578	23494		Araguaia River
I. araguaiaensis	51521	32812	20906		Araguaia River
I. araguaiaensis	50739	106069	21888		Araguaia River
I. araguaiaensis	49265	80066	19472		Araguaia River
I. araguaiaensis	56817	81501	37047		Araguaia River
I. araguaiaensis	57259	84570	36661		Araguaia River
I. araguaiaensis	58014	52603	37012		Araguaia River
I. araguaiaensis	61975	46410	36879		Araguaia River
I. araguaiaensis	58401	45066	35817		Araguaia River
I. araguaiaensis	58966	43611	35845		Araguaia River
I. araguaiaensis	47768	91407	36083		Araguaia River
I. araguaiaensis	48664	92916	34745		Araguaia River
I. araguaiaensis	48889	71524	25832		Araguaia River
I. araguaiaensis	49492	96892	22964		Araguaia River
I. araguaiaensis	47824	87982	21932		Araguaia River
I. araguaiaensis	71062	89318	25426		Araguaia River
I. araguaiaensis	69757	89180	29290		Araguaia River
I. araguaiaensis	69551	86507	32536		Araguaia River
I. araguaiaensis	80909	87004	56987		Araguaia River
I. araguaiaensis	79619	87558	56755		Araguaia River
I. araguaiaensis	63261	84733	56444		Araguaia River
I. araguaiaensis	62714	82528	51096		Araguaia River
I. araguaiaensis	60716	72099	36032		Araguaia River
I. araguaiaensis	60024	72425	36551		Araguaia River
I. araguaiaensis	58573	50619	35798		Araguaia River
I. araguaiaensis	58380	49188	34966		Araguaia River
I. araguaiaensis	57270	67351	34236		Araguaia River
I. araguaiaensis	40221	76605	37850		Araguaia River
I. araguaiaensis	39991	76729	38596		Araguaia River
I. araguaiaensis	41003	80200	40660		Araguaia River
I. araguaiaensis	44664	65096	18627		Araguaia River
I. araguaiaensis	44638	107416	38511		Araguaia River
I. araguaiaensis	57532	69116	33819		Araguaia River
I. araguaiaensis	56742	70650	32461		Araguaia River
I. araguaiaensis	56576	72186	44617		Araguaia River
I. araguaiaensis	58595	76097	48596		Araguaia River
I. araguaiaensis	51341	81113	48346		Araguaia River
I. araguaiaensis	49433	89113	64570		Araguaia River
I. araguaiaensis	49172	95667	36054		Araguaia River
I. araguaiaensis	48230	88869	63960		Araguaia River
I. araguaiaensis	56915	87530	65409		Araguaia River
I. araguaiaensis	55701	86635	58424		Araguaia River
I. araguaiaensis	54166	89079	60174		Araguaia River
I. araguaiaensis	53259	83343	33152		Araguaia River
I. araguaiaensis	50872	82274	27995		Araguaia River
I. araguaiaensis	50342	58886	20556		Araguaia River
I. araguaiaensis	47237	81409	20151		Araguaia River
I. araguaiaensis	46151	79504	21021		Araguaia River
I. araguaiaensis	44153	77815	17007		Araguaia River
I. araguaiaensis	43259	71901	16818		Araguaia River
I. araguaiaensis	42264	83500	28712		Araguaia River
I. araguaiaensis	50388	50347	29785	32.7675	Araguaia River
I. araguaiaensis	38212	98746	31272	43.66	Araguaia River
I. araguaiaensis	40084	122547	31792	22.5675	Araguaia River
I. araguaiaensis	53147	124468	29557	25.125	Araguaia River
I. araguaiaensis	53476	121408	27976	22.77	Araguaia River
I. araguaiaensis	53246	118167	27162	21.175	Araguaia River
I. araguaiaensis	52876	120568	71982	21.4425	Araguaia River
I. araguaiaensis	51822	116785	70651	22.705	Araguaia River
I. araguaiaensis	92827	118273	29843	21.2325	Araguaia River
I. araguaiaensis	92944	123183	27827	22.915	Araguaia River
I. araguaiaensis	48696	121927	34878	21.815	Araguaia River
I. araguaiaensis	46735	81782	31953	25.0525	Araguaia River
I. araguaiaensis	45305	100111	32138	26.9925	Araguaia River
I. araguaiaensis	44293	115913	33033	26.315	Araguaia River
I. araguaiaensis	34962	70601	33769	25.6525	Araguaia River
I. araguaiaensis	35353	64966	32919	27.805	Araguaia River
I. araguaiaensis	36226	63352	30830	28.3925	Araguaia River
I. araguaiaensis	36685	65179	30294	26.0325	Araguaia River
I. araguaiaensis	49931	66890	47575	27.1325	Araguaia River
I. araguaiaensis	49136	66849	45831	26.005	Araguaia River
I. araguaiaensis	48837	68063	44318	26.92	Araguaia River
I. araguaiaensis	48444	68134	43289	25.405	Araguaia River
I. araguaiaensis	47671	68709	41386	26.495	Araguaia River
I. araguaiaensis	58527	85078	36528	25.615	Araguaia River
I. araguaiaensis	57862	87093	29962	26.9125	Araguaia River
I. araguaiaensis	57980	90758	30304	26.97	Araguaia River
I. araguaiaensis	57994	88366	29404	26.025	Araguaia River
I. araguaiaensis	58220	90611	30408	25.8825	Araguaia River
I. araguaiaensis	56839	87411	25259	25.8725	Araguaia River
I. araguaiaensis	55853	87221	18846	25.16	Araguaia River
I. araguaiaensis	54857	86717	27909	24.0925	Araguaia River
I. araguaiaensis	52534	40629	27597	24.3325	Araguaia River
I. araguaiaensis	51500	68924	26228	24.54	Araguaia River
I. araguaiaensis	50851	57302	25511	24.605	Araguaia River
I. araguaiaensis	50705	95059	24715	22.5625	Araguaia River
I. araguaiaensis	92039	91960	29063	22.705	Araguaia River
I. araguaiaensis	90185	51038	28870	23.885	Araguaia River
I. araguaiaensis	87390	99956	33359	23.485	Araguaia River
I. araguaiaensis	70163	100616	34542	24.8675	Araguaia River
I. araguaiaensis	66084	67194	33037	23.9225	Araguaia River
I. araguaiaensis	62724	61841	26551	23.4325	Araguaia River
I. araguaiaensis	62433	55836	23145	23.015	Araguaia River
I. araguaiaensis	61420	54052	21638	23.2225	Araguaia River
I. araguaiaensis	59643	58470	20555	22.9575	Araguaia River
I. araguaiaensis	55732	58436	19036	23.9875	Araguaia River
I. araguaiaensis	55302	57619	17747	23.85	Araguaia River
I. araguaiaensis	55396	57563	18955	23.955	Araguaia River
I. araguaiaensis	54690	81277	23610	24.37	Araguaia River
I. araguaiaensis	54154	82295	28321	23.1175	Araguaia River
I. araguaiaensis	55026	86642	59806	22.94	Araguaia River
I. araguaiaensis	87102	84312	59671	23.515	Araguaia River
I. araguaiaensis	85550	81623	28944	22.14	Araguaia River
I. araguaiaensis	76190	70753	28361	23.925	Araguaia River
I. araguaiaensis	42290	33952	24531	23.075	Araguaia River
I. araguaiaensis	42502	34363	25255	23.945	Araguaia River
I. araguaiaensis	42280	33736	14931	24.07	Araguaia River
I. araguaiaensis	41872	76634	16519	23.1425	Araguaia River
I. araguaiaensis	41775	62280	17017	22.8025	Araguaia River
I. araguaiaensis	40872	57574	18966	22.81	Araguaia River
I. araguaiaensis	39939	78415	18988	24.2275	Araguaia River
I. araguaiaensis	39121	79412	18663	24.17	Araguaia River
I. araguaiaensis	38530	51966	17293	22.35	Araguaia River
I. araguaiaensis	38369	50042	15372	22.86	Araguaia River
I. araguaiaensis	64354	93026	22575	25.54	Araguaia River
I. araguaiaensis	64527	95003	22020	24.8275	Araguaia River
I. araguaiaensis	64221	46606	23209	22.4175	Araguaia River
I. araguaiaensis	55364	46682	25330	21.945	Araguaia River
I. araguaiaensis	55512	45761	23502	21.6925	Araguaia River
I. araguaiaensis	55145	69350	21939	21.0675	Araguaia River
I. araguaiaensis	53563	54309	22332	22.13	Araguaia River
I. araguaiaensis	52359	55124	22598	22.6075	Araguaia River
I. araguaiaensis	52386	48135	36635	22.63	Araguaia River
I. araguaiaensis	53666	47432	37964	23.4775	Araguaia River
I. araguaiaensis	54077	82460	38525	23.755	Araguaia River
I. araguaiaensis	54301	81243	37652	23.9575	Araguaia River
I. araguaiaensis	65105	83034	38440	23.7425	Araguaia River
I. araguaiaensis	64858	88715	35049	23.275	Araguaia River
I. araguaiaensis	64822	84698	34165	24.12	Araguaia River
I. araguaiaensis	64940	93590	36489	23.915	Araguaia River
I. araguaiaensis	43565	89732	19055	24.4125	Araguaia River
I. araguaiaensis	43326	50515	18976	26.4075	Araguaia River
I. araguaiaensis	44139	75210	19510	32.8175	Araguaia River
I. araguaiaensis	44725	79823	20106	37.1075	Araguaia River
I. araguaiaensis	44802	51042	19815	51.235	Araguaia River
I. araguaiaensis	68132	87536	21613	17.615	Araguaia River
I. araguaiaensis	68087	86145	53230	17.735	Araguaia River
I. araguaiaensis	85205	87707	51333	17.51	Araguaia River
I. araguaiaensis	84908	90094	50676	16.3475	Araguaia River
I. araguaiaensis	56815	88741	48004	17.505	Araguaia River
I. araguaiaensis	56728	88709	45307	18.9175	Araguaia River
I. araguaiaensis	55558	86277	43147	20.0925	Araguaia River
I. araguaiaensis	53991	85483	38215	21.06	Araguaia River
I. araguaiaensis	68502	76715	36227	23.275	Araguaia River
I. araguaiaensis	67507	76337	35229	22.045	Araguaia River
I. araguaiaensis	67053	56419	34865	22.975	Araguaia River
I. araguaiaensis	67186	54801	34384	22.545	Araguaia River
I. araguaiaensis	66654	72652	34432	24.1625	Araguaia River
I. araguaiaensis	66972	68216	36780	23.4225	Araguaia River
I. araguaiaensis	48722	68838	37925	23.1325	Araguaia River
I. araguaiaensis	47112	49667	37512	23.06	Araguaia River
I. araguaiaensis	42866	47409	36080	21.8675	Araguaia River
I. araguaiaensis	41363	46025	21936	21.37	Araguaia River
I. araguaiaensis	41428	75993	19774	20.67	Araguaia River
I. araguaiaensis	40636	69610	18032	21.455	Araguaia River
I. araguaiaensis	40554	79556	17436	21.3475	Araguaia River
I. araguaiaensis	39942	71652	16063	22.3325	Araguaia River
I. araguaiaensis	39877	67847	14600	21.96	Araguaia River
I. araguaiaensis	39471	62172	13884	22	Araguaia River
I. araguaiaensis	39202	60801	13690	21.75	Araguaia River
I. araguaiaensis	65113	67194	32157	22.1875	Araguaia River
I. araguaiaensis	63897	66669	34588	23.0475	Araguaia River
I. araguaiaensis	62115	67919	36238	22.2125	Araguaia River
I. araguaiaensis	58559	82811	40018	22.8025	Araguaia River
I. araguaiaensis	56604	82281	47020	22.78	Araguaia River
I. araguaiaensis	56544	77866	44586	23.0525	Araguaia River
I. araguaiaensis	67682	70282	37603	23.7875	Araguaia River
I. araguaiaensis	65435	59724	33353	24.25	Araguaia River
I. araguaiaensis	64875	91728	21081	23.21	Araguaia River
I. araguaiaensis	62574	91184	19225	21.98	Araguaia River
I. araguaiaensis	60777	91620	17657	23.84	Araguaia River
I. araguaiaensis	59917	72299	16533	22.825	Araguaia River
I. araguaiaensis	58700	71097	27007	22.945	Araguaia River
I. araguaiaensis	57743	69789	28944	24.85	Araguaia River
I. araguaiaensis	56652	52450	29186	24.955	Araguaia River
I. araguaiaensis	55127	51974	28756	25.82	Araguaia River
I. araguaiaensis	38666	51163	26503	26.315	Araguaia River
I. araguaiaensis	38485	50661	12847	26.5175	Araguaia River
I. araguaiaensis	38243	47894	12888	23.7425	Araguaia River
I. araguaiaensis	37831	47831	23095	24.2325	Araguaia River
I. araguaiaensis	37216	60233	37630	22.5425	Araguaia River
I. araguaiaensis	59416	64756	38096	21.74	Araguaia River
I. araguaiaensis	56445	65916	24438	22.4775	Araguaia River
I. araguaiaensis	55116	66245	24012	21.0375	Araguaia River
I. araguaiaensis	54701	68359	22265	23.905	Araguaia River
I. araguaiaensis	54261	92911	22011	23.7525	Araguaia River
I. araguaiaensis	53786	95949	21989	24.5825	Araguaia River
I. araguaiaensis	53580	95496	22351	23.73	Araguaia River
I. araguaiaensis	53601	99280	32536	25.8275	Araguaia River
I. araguaiaensis	52841	100303	33787	26.72	Araguaia River
I. araguaiaensis	50708	110887	34960	25.3925	Araguaia River
I. araguaiaensis	51235	103849	40341	25.1425	Araguaia River
I. araguaiaensis	50672	98346	24520	25.2175	Araguaia River
I. araguaiaensis	50521	53246	25065	27.885	Araguaia River
I. araguaiaensis	49444	53210	40762	24.805	Araguaia River
I. araguaiaensis	48856	54493	40946	26.0175	Araguaia River
I. araguaiaensis	48425	49855	13413	33.0975	Araguaia River
I. araguaiaensis	48135	45388	12598	29.655	Araguaia River
I. araguaiaensis	48131	44657	23952	27.6275	Araguaia River
I. araguaiaensis	46897	53157	30555	33.3775	Araguaia River
I. araguaiaensis	45638	95741	30591	28.615	Araguaia River
I. araguaiaensis	39264	95684	28597	32.8	Araguaia River
I. araguaiaensis	39963	93606	19011	31.025	Araguaia River
I. araguaiaensis	40308	97935	25429	27.77	Araguaia River
I. araguaiaensis	40350	62968	23112	29.71	Araguaia River
I. araguaiaensis	39778	92225	37563	34.5075	Araguaia River
I. araguaiaensis	63436	90580	37613	27.9625	Araguaia River
I. araguaiaensis	59937	89265	21020	26.96	Araguaia River
I. araguaiaensis	53454	93701	36183	26.6625	Araguaia River
I. araguaiaensis	73313	86451	34138	26.61	Araguaia River
I. araguaiaensis	70443	56572	32254	29.19	Araguaia River
I. araguaiaensis	63776	87068	21846	22.465	Araguaia River
I. araguaiaensis	61098	78837	18763	24.4325	Araguaia River
I. araguaiaensis	60772	79215	15739	22.705	Araguaia River
I. araguaiaensis	60498	63284	14051	25.5175	Araguaia River
I. araguaiaensis	59591	76386	14058	23.5025	Araguaia River
I. araguaiaensis	44791	80519	26885	24.0975	Araguaia River
I. araguaiaensis	44851	77289	24562	23.4925	Araguaia River
I. araguaiaensis	44328	65567	22756	23.1425	Araguaia River
I. araguaiaensis	44763	58462	24344	23.35	Araguaia River
I. araguaiaensis	40626	56066	42695	23.61	Araguaia River
I. araguaiaensis	51623	85852	40472	24.4825	Araguaia River
I. araguaiaensis	52093	63684	37798	23.5125	Araguaia River
I. araguaiaensis	50227	66557	44063	25.0825	Araguaia River
I. araguaiaensis	57825	69443	32614	24.5925	Araguaia River
I. araguaiaensis	57772	70260	21171	24.765	Araguaia River
I. araguaiaensis	57150	69346	29320	26.0325	Araguaia River
I. araguaiaensis	55845	62413	29200	25.3325	Araguaia River
I. araguaiaensis	55541	79968	28444	24.41	Araguaia River
I. araguaiaensis	55270	79942	31782	26.085	Araguaia River
I. araguaiaensis	67087	82427	35327	27.895	Araguaia River
I. araguaiaensis	66153	91297	37834	33.05	Araguaia River
I. araguaiaensis	63407	92080	39758	45.6175	Araguaia River
I. araguaiaensis	41065	95112	11561		Araguaia River
I. araguaiaensis	35171	76361	12677	18.77	Araguaia River
I. araguaiaensis	34408	77575	16621	21.6525	Araguaia River
I. araguaiaensis	34032	84850	18457	23.45	Araguaia River
I. araguaiaensis	33104	77185	19790	20.8375	Araguaia River
I. araguaiaensis	33346	89372	28520	18.7025	Araguaia River
I. araguaiaensis	33023	94700	29309	20.985	Araguaia River
I. araguaiaensis	33414	98794	40165	22.45	Araguaia River
I. araguaiaensis	34476	104889	19389	23.305	Araguaia River
I. araguaiaensis	35224	74074	20614	23.5675	Araguaia River
I. araguaiaensis	35721	60838	20787	25.225	Araguaia River
I. araguaiaensis	58212	62645	39337	22.965	Araguaia River
I. araguaiaensis	59245	63644	28803	23.6625	Araguaia River
I. araguaiaensis	48511	68231	27886	23.755	Araguaia River
I. araguaiaensis	49067	62347	24163	21.95	Araguaia River
I. araguaiaensis	49071	69131	21377	22.605	Araguaia River
I. araguaiaensis	49210	71865	19955	22.8825	Araguaia River
I. araguaiaensis	49353	79223	29400	22.8325	Araguaia River
I. araguaiaensis	38443	95303	55512	20.9325	Araguaia River
I. araguaiaensis	39153	94230	53398	21.025	Araguaia River
I. araguaiaensis	39655	93188	52362	20.56	Araguaia River
I. araguaiaensis	39984	89144	47149	20.925	Araguaia River
I. araguaiaensis	40677	85314	44172	21.1175	Araguaia River
I. araguaiaensis	40641	71460	45185	22.375	Araguaia River
I. araguaiaensis	39585	70121	43906	22.67	Araguaia River
I. araguaiaensis	37776	70516	42636	23.13	Araguaia River
I. araguaiaensis	36719	73353	39311	22.3175	Araguaia River
I. araguaiaensis	36090	95277	36374	22.9025	Araguaia River
I. araguaiaensis	35658	85353	30298	23.88	Araguaia River
I. araguaiaensis	34970	36440	28289	22.885	Araguaia River
I. araguaiaensis	34179	89360	28032	21.8375	Araguaia River
I. araguaiaensis	64814	79447	32295	21.555	Araguaia River
I. araguaiaensis	64272	45320	29569	22.6625	Araguaia River
I. araguaiaensis	63545	73490	30456	21.7375	Araguaia River
I. araguaiaensis	62563	65945	31232	21.64	Araguaia River
I. araguaiaensis	61678	64514	18468	22.685	Araguaia River
I. araguaiaensis	59927	51553	18247	23.2525	Araguaia River
I. araguaiaensis	59056	49184	18029	24.5075	Araguaia River
I. araguaiaensis	58116	53880	29885	26.745	Araguaia River
I. araguaiaensis	57490	58841	30985	26.3775	Araguaia River
I. araguaiaensis	40835	47452	30889	24.8675	Araguaia River
I. araguaiaensis	40275	48205	30719	28.5875	Araguaia River
I. araguaiaensis	40477	47054	29424	33.3775	Araguaia River
I. araguaiaensis	41069	42290	27152	31.37	Araguaia River
I. araguaiaensis	42586	39144	26039	40.11	Araguaia River
I. araguaiaensis	42793	36595	24141	79.9175	Araguaia River
I. araguaiaensis	39393	73581	28964	41.45	Araguaia River
I. araguaiaensis	35543	94585	12475	23.05	Araguaia River
I. araguaiaensis	36197	74966	13587	21.035	Araguaia River
I. araguaiaensis	36044	67504	11853	22.6675	Araguaia River
I. araguaiaensis	35886	60197	11902	23.0325	Araguaia River
I. araguaiaensis	35712	55130	19185	23.4225	Araguaia River
I. araguaiaensis	36280	69438	32369	22.4425	Araguaia River
I. araguaiaensis	44331	79657	48223	20.8225	Araguaia River
I. araguaiaensis	43022	78491	40772	21.2675	Araguaia River
I. araguaiaensis	41783	74544	40241	22.3575	Araguaia River
I. araguaiaensis	41091	69484	39054	24.3625	Araguaia River
I. araguaiaensis	40496	70353	37098	24.49	Araguaia River
I. araguaiaensis	40258	63801	35609	23.175	Araguaia River
I. araguaiaensis	40405	64560	35657	22.975	Araguaia River
I. araguaiaensis	52232	68634	37627	21.81	Araguaia River
I. araguaiaensis	55417	69729	36425	22.52	Araguaia River
I. araguaiaensis	55686	56884	33557	24.5625	Araguaia River
I. araguaiaensis	55868	51656	34035	27.8025	Araguaia River
I. araguaiaensis	45651	63680	31040	25.87	Araguaia River
I. araguaiaensis	46792	59122	27197	25.81	Araguaia River
I. araguaiaensis	36677	51844	24288	31	Araguaia River
I. araguaiaensis	36540	49545	20905	27.2775	Araguaia River
I. araguaiaensis	36798	49347	11763	24.24	Araguaia River
I. araguaiaensis	37491	56625	11834	24.5525	Araguaia River
I. araguaiaensis	37801	58412	12597	26.025	Araguaia River
I. araguaiaensis	37480	59296	13302	22.74	Araguaia River
I. araguaiaensis	37695	63156	15040	24.95	Araguaia River
I. araguaiaensis	62600	61407	40027	28.9375	Araguaia River
I. araguaiaensis	58169	61541	37929	30.4425	Araguaia River
I. araguaiaensis	58410	57362	40672	32.5825	Araguaia River
I. araguaiaensis	38885	52468	40177	34.0025	Araguaia River
I. araguaiaensis	38276	50719	22261	40.71	Araguaia River
I. araguaiaensis	39952	122461	22665	35.915	Araguaia River
I. araguaiaensis	38527	129921	24990	27.915	Araguaia River
I. araguaiaensis	50091	116480	33264	23.035	Araguaia River
I. araguaiaensis	48800	115504	32884	22.3425	Araguaia River
I. araguaiaensis	45658	112840	30702	27.2375	Araguaia River
I. araguaiaensis	44959	87864	25257	27.7175	Araguaia River
I. araguaiaensis	44466	40707	22845	33.8625	Araguaia River
I. araguaiaensis	42992	37982	16880	47.7425	Araguaia River
I. araguaiaensis	41580	47991	17055	61.39	Araguaia River
I. araguaiaensis	38738	76728	40652	73.4875	Araguaia River
I. araguaiaensis	35842	49469	11343	79.8925	Araguaia River
I. araguaiaensis	35586	92467	23449	78.785	Araguaia River
I. araguaiaensis	35202	72343	24371	77.66	Araguaia River
I. araguaiaensis	47995	81418	45785	79.6725	Araguaia River
I. araguaiaensis	44673	76278	45230	108.153	Araguaia River
I. araguaiaensis	45921	79161	51160	67.1325	Araguaia River
I. araguaiaensis	37242	94143	31751	60.8225	Araguaia River
I. araguaiaensis	70186	60532	19103	45.5525	Araguaia River
I. araguaiaensis	55564	75884	36972	44.0075	Araguaia River
I. araguaiaensis	56257	80423	36561	39.085	Araguaia River
I. araguaiaensis	52129	76796	37223	37.9775	Araguaia River
I. araguaiaensis	63217	113881	22458	39.7325	Araguaia River
I. araguaiaensis	37119	70850	31236	39.1125	Araguaia River
I. araguaiaensis	69252	82276	35637		Araguaia River
I. araguaiaensis	40942	72805	19353	32.33	Araguaia River
I. araguaiaensis	36180	96068	31101	24.145	Araguaia River
I. araguaiaensis	36785	57624	19202	24.6	Araguaia River
I. araguaiaensis	37511	61015	19798	24.1375	Araguaia River
I. araguaiaensis	75588	52717	24937	25.3675	Araguaia River
I. araguaiaensis	75415	51864	29693	21.8575	Araguaia River
I. araguaiaensis	72771	111704	31478	24.9375	Araguaia River
I. araguaiaensis	81694	97617	34132	27.71	Araguaia River
I. araguaiaensis	81992	100894	25045	28.745	Araguaia River
I. araguaiaensis	81787	86357	21070	31.105	Araguaia River
I. araguaiaensis	45932	80682	21548	35.6025	Araguaia River
I. araguaiaensis	47490	84904	37302	40.685	Araguaia River
I. araguaiaensis	51784	79183	49104	33.7875	Araguaia River
I. araguaiaensis	37600	76037	30418	35.4525	Araguaia River
I. araguaiaensis	37655	42965	28978	34.45	Araguaia River
I. araguaiaensis	38127	54691	31751	30.175	Araguaia River
I. araguaiaensis	39747	56807	25656	28.8575	Araguaia River
I. araguaiaensis	41582	57362	21750	25.305	Araguaia River
I. araguaiaensis	42195	91240	19599	23.8325	Araguaia River
I. araguaiaensis	41969	94048	19691	24.4975	Araguaia River
I. araguaiaensis	40878	87415	29496	25.7125	Araguaia River
I. araguaiaensis	40241	74638	31498	24.7375	Araguaia River
I. araguaiaensis	52721	75757	30460	26.7675	Araguaia River
I. araguaiaensis	52166	69673	29569		Araguaia River
I. araguaiaensis	34872	80456	12420	23.1375	Araguaia River
I. araguaiaensis	35745	80648	36491	22.4625	Araguaia River
I. araguaiaensis	37106	77410	38595	21.6325	Araguaia River
I. araguaiaensis	38264	77435	39062	19.925	Araguaia River
I. araguaiaensis	40169	76615	38081	19.3075	Araguaia River
I. araguaiaensis	40552	74662	37363	19.465	Araguaia River
I. araguaiaensis	40800	71253	34132	20.2375	Araguaia River
I. araguaiaensis	47775	64850	32720	23.2825	Araguaia River
I. araguaiaensis	47997	57967	32440	25.28	Araguaia River
I. araguaiaensis	47253	60061	33163	26.0275	Araguaia River
I. araguaiaensis	46775	69020	33085	30.0975	Araguaia River
I. araguaiaensis	48100	61861	33234	35.3	Araguaia River
I. araguaiaensis	47255	59095	31605	49.28	Araguaia River
I. araguaiaensis	37378	49027	26731	70.6925	Araguaia River
I. araguaiaensis	36316	48747	17649		Araguaia River
I. araguaiaensis	40177	61142	30156	112.692	Araguaia River
I. araguaiaensis	40927	60766	27673	165.025	Araguaia River
I. araguaiaensis	41018	62851	34612	179.77	Araguaia River
I. araguaiaensis	51003	86253	45472	106.02	Araguaia River
I. araguaiaensis	46630	95309	64126	93.0375	Araguaia River
I. araguaiaensis	57521	102428	48498	83.57	Araguaia River
I. araguaiaensis	42602	100362	57564	48.9275	Araguaia River
I. araguaiaensis	42209	101329	76394	43.3375	Araguaia River
I. araguaiaensis	42088	104132	76127	31.4025	Araguaia River
I. araguaiaensis	52923	103137	78773	29.635	Araguaia River
I. araguaiaensis	40842	93505	51745		Araguaia River
I. araguaiaensis	38756	19625	12710	66.2375	Araguaia River
I. araguaiaensis	39634	43574	12247	73.575	Araguaia River
I. araguaiaensis	40133	43914	12417	96.615	Araguaia River
I. araguaiaensis	40005	44158	12685	69.15	Araguaia River
I. araguaiaensis	40843	20051	12530	95.9925	Araguaia River
I. araguaiaensis	41622	46022	13351	111.985	Araguaia River
I. araguaiaensis	41778	21109	13217	113.81	Araguaia River
I. araguaiaensis	91306	24184	16620	86.2125	Araguaia River
I. araguaiaensis	92443	50946	17368	86.925	Araguaia River
I. araguaiaensis	43142	74756	13568		Araguaia River
I. araguaiaensis	51439	18933	13229		Araguaia River
I. araguaiaensis	50866	19620	13654		Araguaia River
I. araguaiaensis	45832	55471	18550		Araguaia River
I. araguaiaensis	45612	76844	29694		Araguaia River
I. araguaiaensis	51926	19178	13920		Araguaia River
I. araguaiaensis	45597	87056	19536		Araguaia River
I. araguaiaensis	45761	87748	19404		Araguaia River
I. araguaiaensis	45803	86867	19363		Araguaia River
I. araguaiaensis	52272	19606	14061		Araguaia River
I. araguaiaensis	51598	20029	14195		Araguaia River
I. araguaiaensis	37356	27638	15181	69.495	Araguaia River
I. araguaiaensis	67838	44813	29014	66.0275	Araguaia River
I. araguaiaensis	70196	43109	32593	77.2475	Araguaia River
I. araguaiaensis	72983	44119	32820	73.365	Araguaia River
I. araguaiaensis	67955	43347	31960	81.2375	Araguaia River
I. araguaiaensis	67058	43571	30462	64.24	Araguaia River
I. araguaiaensis	69725	89132	30487		Araguaia River
I. araguaiaensis	51090	88556	67096	46.3625	Araguaia River
I. araguaiaensis	103277	55568	11123	54.54	Araguaia River
I. araguaiaensis	49807	85410	7991	69.59	Araguaia River
I. araguaiaensis	49631	70784	17949	93.105	Araguaia River
I. araguaiaensis	42278	57139	7529	90.6875	Araguaia River
I. araguaiaensis	52927	88544	69435	63.225	Araguaia River
I. araguaiaensis	42034	22259	7187	98.7125	Araguaia River
I. araguaiaensis	55770	87067	58590		Araguaia River
I. araguaiaensis	80506	22029	8068	44.9375	Araguaia River
I. araguaiaensis	80430	22397	7827	43.3475	Araguaia River
I. araguaiaensis	80909	66355	7912	59.7325	Araguaia River
I. araguaiaensis	100686	90894	12035	81.19	Araguaia River
I. araguaiaensis	48091	32965	9635	88.2525	Araguaia River
I. araguaiaensis	102788	96054	12501	135.785	Araguaia River
I. araguaiaensis	37042	52515	8755	111.817	Araguaia River
I. araguaiaensis	87664	75375	8982	107.502	Araguaia River
I. araguaiaensis	55063	32944	18244	77.8675	Araguaia River
I. araguaiaensis	55557	75488	11822	83.5925	Araguaia River
I. araguaiaensis	54538	75377	20214	44.5375	Araguaia River
I. araguaiaensis	54495	42439	26361	34.1775	Araguaia River
I. araguaiaensis	54429	84873	28792		Araguaia River
I. araguaiaensis	44078	35766	11112	49.8175	Araguaia River
I. araguaiaensis	43575	43862	11808	74.1125	Araguaia River
I. araguaiaensis	44510	104753	12504	3.99	Araguaia River
I. araguaiaensis	44031	44023	11529	57.18	Araguaia River
I. araguaiaensis	44116	85850	11753	56.3975	Araguaia River
I. araguaiaensis	44187	94463	12408	57.54	Araguaia River
I. araguaiaensis	44254	106282	11083	99.31	Araguaia River
I. araguaiaensis	97094	95176	12257	87.865	Araguaia River
I. araguaiaensis	98057	49714	11730	120.517	Araguaia River
I. araguaiaensis	45182	86198	11006	89.8075	Araguaia River
I. araguaiaensis	45382	88703	11723	112.752	Araguaia River
I. araguaiaensis	98609	114934	12170	68.6875	Araguaia River
I. araguaiaensis	45583	100176	11926	122.51	Araguaia River
I. araguaiaensis	45363	91178	11893	35.78	Araguaia River
I. araguaiaensis	45891	108293	11777	37.26	Araguaia River
I. araguaiaensis	100334	116236	12815	42.6275	Araguaia River
I. araguaiaensis	101052	101369	12369		Araguaia River
I. araguaiaensis	52249	121893	13408	36.4875	Araguaia River
I. araguaiaensis	98832	128434	14855	47.5575	Araguaia River
I. araguaiaensis	100079	124321	14896	50.46	Araguaia River
I. araguaiaensis	100570	125563	14861	76.73	Araguaia River
I. araguaiaensis	101122	127350	15041	44.44	Araguaia River
I. araguaiaensis	102154	107343	15162	66.16	Araguaia River
I. araguaiaensis	102344	130162	15065	68.2	Araguaia River
I. araguaiaensis	102653	86864	14601	78.18	Araguaia River
I. araguaiaensis	58101	86882	16793	69.8675	Araguaia River
I. araguaiaensis	103935	87503	13877	134.042	Araguaia River
I. araguaiaensis	105448	88980	13692	68.88	Araguaia River
I. araguaiaensis	105981	91246	13768		Araguaia River
I. araguaiaensis	72352	20521	13887	39.2375	Araguaia River
I. araguaiaensis	72274	61711	13256	34.5875	Araguaia River
I. araguaiaensis	50162	34273	14022	31.0825	Araguaia River
I. araguaiaensis	51143	19772	13157	30.8125	Araguaia River
I. araguaiaensis	50291	19385	13627	29.76	Araguaia River
I. araguaiaensis	51444	28800	12681	28.4175	Araguaia River
I. araguaiaensis	51129	32183	13465	30.84	Araguaia River
I. araguaiaensis	51073	19753	12465	30.3625	Araguaia River
I. araguaiaensis	37131	55798	29119	30.8225	Araguaia River
I. araguaiaensis	51127	19461	12851	33.9425	Araguaia River
I. araguaiaensis	41631	32460	21228	38.4375	Araguaia River
I. araguaiaensis	51541	32214	12944	45.5375	Araguaia River
I. araguaiaensis	51068	19571	12490		Araguaia River
I. araguaiaensis	39869	19250	10366	29.805	Araguaia River
I. araguaiaensis	60201	22312	15683	37.15	Araguaia River
I. araguaiaensis	60813	23209	16139	43.6425	Araguaia River
I. araguaiaensis	60773	70163	16661	68.615	Araguaia River
I. araguaiaensis	70845	79940	30393	77.775	Araguaia River
I. araguaiaensis	64647	74748	20836	67.6575	Araguaia River
I. araguaiaensis	61788	70042	16367	73.2525	Araguaia River
I. araguaiaensis	62042	69428	17559	55.855	Araguaia River
I. araguaiaensis	62592	23927	17064	51.7175	Araguaia River
I. araguaiaensis	62204	47853	16146	58.8375	Araguaia River
I. araguaiaensis	62083	22996	15334	55.63	Araguaia River
I. araguaiaensis	63143	48714	16954	51.9525	Araguaia River
I. araguaiaensis	63937	23667	16328	53.8125	Araguaia River
I. araguaiaensis	63112	24355	16565	50.695	Araguaia River
I. araguaiaensis	62989	24182	16526	52.4825	Araguaia River
I. araguaiaensis	62657	24944	15189		Araguaia River
I. araguaiaensis	58203	36372	23823	34.845	Araguaia River
I. araguaiaensis	58317	36067	23910	37.3075	Araguaia River
I. araguaiaensis	60394	36820	28171	47.7175	Araguaia River
I. araguaiaensis	64278	36099	26970	58.075	Araguaia River
I. araguaiaensis	50464	86260	24045	75.9475	Araguaia River
I. araguaiaensis	48996	84011	21909	61.8775	Araguaia River
I. araguaiaensis	49051	91678	20296	50.0575	Araguaia River
I. araguaiaensis	47815	78087	15443	43.7675	Araguaia River
I. araguaiaensis	46282	94885	18936	43.5975	Araguaia River
I. araguaiaensis	45358	65956	13686	37.8225	Araguaia River
I. araguaiaensis	46097	73992	15519	34.7325	Araguaia River
I. araguaiaensis	45097	97571	13717	29.4325	Araguaia River
I. araguaiaensis	44801	85391	31959	26.9925	Araguaia River
I. araguaiaensis	44325	73836	13456	28.0075	Araguaia River
I. araguaiaensis	42491	89184	15342	29.485	Araguaia River
I. araguaiaensis	43415	94522	15889	31.755	Araguaia River
I. araguaiaensis	42479	97498	46424	31.1	Araguaia River
I. araguaiaensis	58044	83721	13775	31.145	Araguaia River
I. araguaiaensis	44175	94151	14806	33.7025	Araguaia River
I. araguaiaensis	56531	82304	15188	34.6075	Araguaia River
I. araguaiaensis	55984	78261	51569	38.42	Araguaia River
I. araguaiaensis	46826	83363	49833	47.43	Araguaia River
I. araguaiaensis	74855	71522	30624	59.185	Araguaia River
I. araguaiaensis	51681	72272	20357		Araguaia River
I. araguaiaensis	44162	25657	14574	42.7325	Araguaia River
I. araguaiaensis	43421	24891	15482	43.435	Araguaia River
I. araguaiaensis	43767	54994	16667	47.235	Araguaia River
I. araguaiaensis	43310	26134	16010	48.87	Araguaia River
I. araguaiaensis	42436	24514	15966	44.815	Araguaia River
I. araguaiaensis	43204	24169	14513	44.395	Araguaia River
I. araguaiaensis	43093	23211	13575	38.365	Araguaia River
I. araguaiaensis	42923	24369	14855	43.7475	Araguaia River
I. araguaiaensis	69040	25198	17904	34.3625	Araguaia River
I. araguaiaensis	66709	25209	17498	32.365	Araguaia River
I. araguaiaensis	42084	21259	12434	29.3225	Araguaia River
I. araguaiaensis	42149	19896	12684	28.79	Araguaia River
I. araguaiaensis	42376	21036	13300	29.4525	Araguaia River
I. araguaiaensis	41985	50800	11212		Araguaia River
I. araguaiaensis	50626	114102	12152	50.9425	Araguaia River
I. araguaiaensis	50885	106006	16712	74.8125	Araguaia River
I. araguaiaensis	51786	13269	9140	75.7475	Araguaia River
I. araguaiaensis	51577	13807	9505	69.4275	Araguaia River
I. araguaiaensis	52215	13223	9025	97.2775	Araguaia River
I. araguaiaensis	66569	13922	9713	86.6875	Araguaia River
I. araguaiaensis	66499	28371	9757	69.19	Araguaia River
I. araguaiaensis	65990	13829	9823	64.82	Araguaia River
I. araguaiaensis	52070	13613	9523	72.2675	Araguaia River
I. araguaiaensis	66699	13965	9920		Araguaia River
I. araguaiaensis	37140	15901	9999	61.3925	Araguaia River
I. araguaiaensis	39395	34771	17677	62.5675	Araguaia River
I. araguaiaensis	51768	20147	13188	65.83	Araguaia River
I. araguaiaensis	51646	20467	13602	73.575	Araguaia River
I. araguaiaensis	50970	19759	13065	68.285	Araguaia River
I. araguaiaensis	39345	75688	21875	60.61	Araguaia River
I. araguaiaensis	49233	91976	29671	54.21	Araguaia River
I. araguaiaensis	50513	85047	20347	49.8575	Araguaia River
I. araguaiaensis	47816	89116	46257	48.285	Araguaia River
I. araguaiaensis	48178	87230	51972	48.085	Araguaia River
I. araguaiaensis	65416	16362	10902	50.7425	Araguaia River
I. araguaiaensis	47261	52589	17797	66.2725	Araguaia River
I. araguaiaensis	46104	16998	11798		Araguaia River
I. araguaiaensis	41037	46565	18149	35.92	Araguaia River
I. araguaiaensis	44295	39935	24771	35.89	Araguaia River
I. araguaiaensis	45260	43298	27163	43.935	Araguaia River
I. araguaiaensis	45144	56977	36382	32.5825	Araguaia River
I. araguaiaensis	47794	74052	37957	37.6225	Araguaia River
I. araguaiaensis	51054	74912	45019	40.2875	Araguaia River
I. araguaiaensis	52806	90210	47586	30.9575	Araguaia River
I. araguaiaensis	48800	85147	49320	42.5825	Araguaia River
I. araguaiaensis	52712	79768	42554	34.9175	Araguaia River
I. araguaiaensis	51469	86126	43713	34.3525	Araguaia River
I. araguaiaensis	56016	83165	42897	38.1625	Araguaia River
I. araguaiaensis	48725	79742	41152	36.9925	Araguaia River
I. araguaiaensis	50085	75991	41746	34.78	Araguaia River
I. araguaiaensis	49788	74524	37005	36.77	Araguaia River
I. araguaiaensis	50011	73451	38984	40.2725	Araguaia River
I. araguaiaensis	50199	71601	33641	46.9875	Araguaia River
I. araguaiaensis	49113	78072	39853	41.555	Araguaia River
I. araguaiaensis	47062	76828	40249	51	Araguaia River
I. araguaiaensis	48418	79418	40902	45.4625	Araguaia River
I. araguaiaensis	48869	70983	38235	45.4375	Araguaia River
I. araguaiaensis	45477	62845	29261	49.545	Araguaia River
I. araguaiaensis	40922	45916	22222		Araguaia River
I. araguaiaensis	42477	43681	23318	45.0925	Araguaia River
I. araguaiaensis	42872	49967	23516	34.64	Araguaia River
I. araguaiaensis	43411	76602	28279	39.4325	Araguaia River
I. araguaiaensis	45120	71124	38879	36.6975	Araguaia River
I. araguaiaensis	47012	73373	43832	46.1725	Araguaia River
I. araguaiaensis	49184	81294	29653	39.975	Araguaia River
I. araguaiaensis	51450	86785	40877	37.96	Araguaia River
I. araguaiaensis	42996	82366	45801	35.045	Araguaia River
I. araguaiaensis	50447	89064	31943	33.0325	Araguaia River
I. araguaiaensis	53067	74493	36363	33.1425	Araguaia River
I. araguaiaensis	51943	88811	45179	33.985	Araguaia River
I. araguaiaensis	42690	77381	44057	36.5125	Araguaia River
I. araguaiaensis	47940	95419	46354	37.565	Araguaia River
I. araguaiaensis	51443	80278	39650	33.585	Araguaia River
I. araguaiaensis	52152	78942	43720	36.37	Araguaia River
I. araguaiaensis	51312	83289	43121	46.9075	Araguaia River
I. araguaiaensis	51144	82786	42904	35.4075	Araguaia River
I. araguaiaensis	53236	75533	31927	34.1875	Araguaia River
I. araguaiaensis	52054	73873	33038	39.5825	Araguaia River
I. araguaiaensis	52353	69339	33146	48.6525	Araguaia River
I. araguaiaensis	50047	75465	32141	39.6025	Araguaia River
I. araguaiaensis	50424	78477	35680	43.98	Araguaia River
I. araguaiaensis	46470	85195	46669	49.22	Araguaia River
I. araguaiaensis	53945	90205	54850	23.5925	Araguaia River
I. araguaiaensis	53427	86639	56087	33.4425	Araguaia River
I. araguaiaensis	50132	63445	40678	49.7275	Araguaia River
I. araguaiaensis	56210	90069	45840	41.8075	Araguaia River
I. araguaiaensis	55143	75870	40336	36.2175	Araguaia River
I. araguaiaensis	48767	64974	33441	45.71	Araguaia River
I. araguaiaensis	52404	83332	35699	39.9125	Araguaia River
I. araguaiaensis	50352	85699	34304	38.7725	Araguaia River
I. araguaiaensis	48359	82924	38996	38.13	Araguaia River
I. araguaiaensis	49656	78393	42531	43.54	Araguaia River
I. araguaiaensis	46701	83260	41530	41.185	Araguaia River
I. araguaiaensis	47152	77523	40723	52.3425	Araguaia River
I. araguaiaensis	46539	87948	40593	45.1	Araguaia River
I. araguaiaensis	47628	94847	26200	40.6275	Araguaia River
I. araguaiaensis	49416	98399	48302	37.43	Araguaia River
I. araguaiaensis	49345	87179	53520	35.5675	Araguaia River
I. araguaiaensis	56304	80034	43500	27.8825	Araguaia River
I. araguaiaensis	48950	74426	42035	29.6475	Araguaia River
I. araguaiaensis	49241	75288	35201	26.7625	Araguaia River
I. araguaiaensis	47818	75817	35223	26.35	Araguaia River
I. araguaiaensis	47945	74636	40223	28.8075	Araguaia River
I. araguaiaensis	56395	81481	45694	27.005	Araguaia River
I. araguaiaensis	47480	91041	49428	28.5275	Araguaia River
I. araguaiaensis	50583	75631	37634	33.5375	Araguaia River
I. araguaiaensis	50840	84411	46933	30.9975	Araguaia River
I. araguaiaensis	51090	82420	44135	34.445	Araguaia River
I. araguaiaensis	49542	77926	40517	39.7725	Araguaia River
I. araguaiaensis	46974	72439	34350	32.5425	Araguaia River
I. araguaiaensis	46570	64077	27844	35.7125	Araguaia River
I. araguaiaensis	45038	68601	28698	32.92	Araguaia River
I. araguaiaensis	44729	59743	23729	61.5725	Araguaia River
I. araguaiaensis	45523	63186	26947		Araguaia River
I. araguaiaensis	68629	98924	65882	49.3475	Araguaia River
I. araguaiaensis	59232	98180	50845	58.925	Araguaia River
I. araguaiaensis	58053	101283	57808	78.4	Araguaia River
I. araguaiaensis	56768	84465	52063	70.1	Araguaia River
I. araguaiaensis	56617	90859	51378	46.3875	Araguaia River
I. araguaiaensis	56738	87104	65097	53.4975	Araguaia River
I. araguaiaensis	56672	87216	56244	47.62	Araguaia River
I. araguaiaensis	56130	87443	60107	53.2575	Araguaia River
I. araguaiaensis	56509	87920	44404	45.1375	Araguaia River
I. araguaiaensis	55331	85698	44222		Araguaia River
I. araguaiaensis	37307	45586	21267	97.0025	Araguaia River
I. araguaiaensis	35605	49126	25472	88.59	Araguaia River
I. araguaiaensis	35802	53066	23847	73.285	Araguaia River
I. araguaiaensis	34896	55065	24191	81.84	Araguaia River
I. araguaiaensis	34690	67792	33785	71.6725	Araguaia River
I. araguaiaensis	33710	72766	37838	81.1425	Araguaia River
I. araguaiaensis	49115	87919	36811	74.4625	Araguaia River
I. araguaiaensis	48199	88967	35574	73.175	Araguaia River
I. araguaiaensis	43726	90114	34122	71.555	Araguaia River
I. araguaiaensis	41793	101077	32639	77.7875	Araguaia River
I. araguaiaensis	40325	96155	32061	80.38	Araguaia River
I. araguaiaensis	39803	79710	12379	66.6475	Araguaia River
I. araguaiaensis	40707	76895	11211	69.7325	Araguaia River
I. araguaiaensis	40963	44159	11514	58.555	Araguaia River
I. araguaiaensis	40994	50908	11498	54.0875	Araguaia River
I. araguaiaensis	41286	46497	11391	40.0975	Araguaia River
I. araguaiaensis	41832	52736	11772	35.0825	Araguaia River
I. araguaiaensis	42058	48510	12590	30.4475	Araguaia River
I. araguaiaensis	42014	48644	14015	28.395	Araguaia River
I. araguaiaensis	41843	53666	13939	27.2675	Araguaia River
I. araguaiaensis	41856	60173	17392	27.66	Araguaia River
I. araguaiaensis	46065	56822	16958	27.1525	Araguaia River
I. araguaiaensis	46388	59287	16014	27.7925	Araguaia River
I. araguaiaensis	47260	44798	17401	30.4825	Araguaia River
I. araguaiaensis	49469	40099	14351	31.8825	Araguaia River
I. araguaiaensis	49545	42220	17758	31.6925	Araguaia River
I. araguaiaensis	49215	42008	12698	30.7675	Araguaia River
I. araguaiaensis	50246	45273	14189	33.265	Araguaia River
I. araguaiaensis	50081	46894	12630	29.4225	Araguaia River
I. araguaiaensis	49846	48604	10999	31.375	Araguaia River
I. araguaiaensis	50362	47242	12038	43.4475	Araguaia River
I. araguaiaensis	32875	50799	11295		Araguaia River
I. araguaiaensis	46227	81755	29430	54.6175	Araguaia River
I. araguaiaensis	48298	81466	13939	62.845	Araguaia River
I. araguaiaensis	48223	119895	35284	61.81	Araguaia River
I. araguaiaensis	47609	123878	36259	66.8625	Araguaia River
I. araguaiaensis	47313	68899	36737	70.59	Araguaia River
I. araguaiaensis	47195	71557	27998	61.8075	Araguaia River
I. araguaiaensis	44883	56218	27070	55.455	Araguaia River
I. araguaiaensis	44246	59279	23761		Araguaia River
I. araguaiaensis	41863	100274	36852	39.6575	Araguaia River
I. araguaiaensis	41117	80583	34706	42.005	Araguaia River
I. araguaiaensis	40341	95471	37740	44.6175	Araguaia River
I. araguaiaensis	41018	98230	43028	45.095	Araguaia River
I. araguaiaensis	40518	100655	39392	47.23	Araguaia River
I. araguaiaensis	39463	94862	44211	50.1975	Araguaia River
I. araguaiaensis	39218	132665	40823	51.4275	Araguaia River
I. araguaiaensis	39658	107822	34550	58.1375	Araguaia River
I. araguaiaensis	40781	93471	36131	60.575	Araguaia River
I. araguaiaensis	40936	93882	43476	68.4125	Araguaia River
I. araguaiaensis	41477	96795	40156	81.2275	Araguaia River
I. araguaiaensis	42392	92645	36782	101.54	Araguaia River
I. araguaiaensis	42822	66310	30736	98.035	Araguaia River
I. araguaiaensis	44315	55482	25733	91.41	Araguaia River
I. araguaiaensis	47374	49931	24878	86.975	Araguaia River
I. araguaiaensis	37941	44273	24741	88.835	Araguaia River
I. araguaiaensis	38953	35686	14728	84.48	Araguaia River
I. araguaiaensis	39820	48366	25535	86.5325	Araguaia River
I. araguaiaensis	40686	63718	32198	76.9	Araguaia River
I. araguaiaensis	44007	74531	36422	96.92	Araguaia River
I. araguaiaensis	44769	81369	38071	88.895	Araguaia River
I. araguaiaensis	47734	87785	40744	79.5725	Araguaia River
I. araguaiaensis	54893	84995	48857	92.4625	Araguaia River
I. araguaiaensis	55093	83991	52706	74.435	Araguaia River
I. araguaiaensis	39422	79764	42460	70.5325	Araguaia River
I. araguaiaensis	38676	77143	30865	69.5975	Araguaia River
I. araguaiaensis	38459	65929	15265	67.66	Araguaia River
I. araguaiaensis	38997	63519	15424	71.365	Araguaia River
I. araguaiaensis	39626	58990	14004	66.935	Araguaia River
I. araguaiaensis	40991	69165	16063	66.215	Araguaia River
I. araguaiaensis	41438	76023	18196	73.655	Araguaia River
I. araguaiaensis	42961	55462	18789	68.7675	Araguaia River
I. araguaiaensis	43813	47828	18499	70.835	Araguaia River
I. araguaiaensis	44308	45860	19741	72.7925	Araguaia River
I. araguaiaensis	45598	46345	15306	70.4	Araguaia River
I. araguaiaensis	36832	35803	16353		Araguaia River
I. araguaiaensis	53118	70375	37974	76.8825	Araguaia River
I. araguaiaensis	54107	78903	49556	60.325	Araguaia River
I. araguaiaensis	44122	82662	56463	47.6725	Araguaia River
I. araguaiaensis	53991	80696	54265	50.845	Araguaia River
I. araguaiaensis	42520	77795	51798	67.6425	Araguaia River
I. araguaiaensis	52232	78595	55380		Araguaia River
I. araguaiaensis	44736	91645	68347		Araguaia River
I. araguaiaensis	59191	85281	66455		Araguaia River
I. araguaiaensis	59572	94687	72583		Araguaia River
I. araguaiaensis	71187	94196	72437		Araguaia River
I. araguaiaensis	38772	124131	36466	47.8825	Araguaia River
I. araguaiaensis	53536	103436	57979	50.3225	Araguaia River
I. araguaiaensis	77832	105733	83136		Araguaia River
I. araguaiaensis	39879	48105	22689	55.415	Araguaia River
I. araguaiaensis	40616	62302	31149	58.505	Araguaia River
I. araguaiaensis	39585	63834	40914	63.6075	Araguaia River
I. araguaiaensis	39411	70711	50305	61.8675	Araguaia River
I. araguaiaensis	40143	73387	54663	52.835	Araguaia River
I. araguaiaensis	41176	74761	52233	49.035	Araguaia River
I. araguaiaensis	38655	72399	47595	45.3025	Araguaia River
I. araguaiaensis	38710	72440	41672	45.29	Araguaia River
I. araguaiaensis	39654	70015	43416	41.18	Araguaia River
I. araguaiaensis	39085	73213	43019	38.2075	Araguaia River
I. araguaiaensis	39712	73418	45936	36.9525	Araguaia River
I. araguaiaensis	39637	75638	50928	34.705	Araguaia River
I. araguaiaensis	50035	82903	48440	36.205	Araguaia River
I. araguaiaensis	39560	71380	45624	35.5175	Araguaia River
I. araguaiaensis	38770	80476	42611	40.4	Araguaia River
I. araguaiaensis	37790	79404	44711	45.59	Araguaia River
I. araguaiaensis	40622	78847	52857	53.75	Araguaia River
I. araguaiaensis	56629	77052	56319	55.0725	Araguaia River
I. araguaiaensis	61219	79684	55314	65.66	Araguaia River
I. araguaiaensis	48981	62978	41961		Araguaia River
I. araguaiaensis	37332	44618	25006	65.935	Araguaia River
I. araguaiaensis	37237	50137	29601	73.495	Araguaia River
I. araguaiaensis	37553	61117	33724	76.515	Araguaia River
I. araguaiaensis	37797	63236	36785	73.9575	Araguaia River
I. araguaiaensis	50985	68318	38198	76.805	Araguaia River
I. araguaiaensis	37295	61465	21954	79.04	Araguaia River
I. araguaiaensis	36035	50790	18191	76.735	Araguaia River
I. araguaiaensis	37091	58995	29392		Araguaia River
I. araguaiaensis	49019	84185	13496	48.6425	Araguaia River
I. araguaiaensis	50877	96495	14202	50.48	Araguaia River
I. araguaiaensis	51561	19866	13906	45.435	Araguaia River
I. araguaiaensis	51801	19665	14159	44.9625	Araguaia River
I. araguaiaensis	50634	66167	14796	42.7525	Araguaia River
I. araguaiaensis	34923	17778	11405	40.83	Araguaia River
I. araguaiaensis	34928	18064	11898	38.9975	Araguaia River
I. araguaiaensis	34904	18362	11885	39.0975	Araguaia River
I. araguaiaensis	35725	17992	11600	45.5725	Araguaia River
I. araguaiaensis	36066	17547	11393	81.5025	Araguaia River
I. araguaiaensis	56783	21371	15538	102.785	Araguaia River
I. araguaiaensis	58838	22117	15627	71.7225	Araguaia River
I. araguaiaensis	37974	20310	12786	72.3425	Araguaia River
I. araguaiaensis	39051	20772	13492	54.8225	Araguaia River
I. araguaiaensis	39552	20946	13309	54.2025	Araguaia River
I. araguaiaensis	39472	20963	13333	84.0575	Araguaia River
I. araguaiaensis	39405	21684	13236		Araguaia River
I. araguaiaensis	34567	29248	12255	19.525	Araguaia River
I. araguaiaensis	67392	39040	29504	27.5225	Araguaia River
I. araguaiaensis	65911	79206	29582	40.3525	Araguaia River
I. araguaiaensis	70061	96984	30550	53.8475	Araguaia River
I. araguaiaensis	38170	22675	13795	56.3125	Araguaia River
I. araguaiaensis	37422	114043	16443	48.4325	Araguaia River
I. araguaiaensis	37978	85345	19579	53.97	Araguaia River
I. araguaiaensis	38341	37724	20176	63.9575	Araguaia River
I. araguaiaensis	37899	32674	18543	57.515	Araguaia River
I. araguaiaensis	38074	38850	20429		Araguaia River
I. araguaiaensis	48819	39336	9457	90.2625	Araguaia River
I. araguaiaensis	48646	71656	20802	141.77	Araguaia River
I. araguaiaensis	47734	81196	10731	165.727	Araguaia River
I. araguaiaensis	46307	78579	11762	182.917	Araguaia River
I. araguaiaensis	45016	76801	10611	87.9425	Araguaia River
I. araguaiaensis	44473	86796	10357	81.7425	Araguaia River
I. araguaiaensis	56153	36128	8763	61.435	Araguaia River
I. araguaiaensis	55912	86713	8784	58.115	Araguaia River
I. araguaiaensis	42981	73471	10278	57.7325	Araguaia River
I. araguaiaensis	55473	48211	8488	49.2	Araguaia River
I. araguaiaensis	42563	46793	10500	40.84	Araguaia River
I. araguaiaensis	42404	47101	11166	34.865	Araguaia River
I. araguaiaensis	42125	47501	10712	35.495	Araguaia River
I. araguaiaensis	42213	57282	11117	37.04	Araguaia River
I. araguaiaensis	41686	47148	10562	38.175	Araguaia River
I. araguaiaensis	42022	58454	11277	39.635	Araguaia River
I. araguaiaensis	42255	45140	10957	36.865	Araguaia River
I. araguaiaensis	41822	47565	10831	35.82	Araguaia River
I. araguaiaensis	41825	45568	10831	34.375	Araguaia River
I. araguaiaensis	41654	46906	11312	33.3975	Araguaia River
I. araguaiaensis	41482	58580	11087	32.715	Araguaia River
I. araguaiaensis	41211	45049	10545	33.575	Araguaia River
I. araguaiaensis	41728	46710	10943	31.8425	Araguaia River
I. araguaiaensis	41536	45993	11237	37.3175	Araguaia River
I. araguaiaensis	41210	45743	11149	45.1675	Araguaia River
I. araguaiaensis	41171	46802	10985	59.6025	Araguaia River
I. araguaiaensis	41149	45917	10641	97.89	Araguaia River
I. araguaiaensis	40814	47352	10971	140.338	Araguaia River
I. araguaiaensis	40362	38754	11388	145.317	Araguaia River
I. araguaiaensis	51574	36970	20878	203.157	Araguaia River
I. araguaiaensis	50344	36282	8866		Araguaia River
I. araguaiaensis	49366	35218	8566		Araguaia River
I. araguaiaensis	43059	95621	13810	53.88	Araguaia River
I. araguaiaensis	43370	95173	25632	93.065	Araguaia River
I. araguaiaensis	43920	94088	21763	170.167	Araguaia River
I. araguaiaensis	46148	90493	70747	189.625	Araguaia River
I. araguaiaensis	49442	94682	75115	143.08	Araguaia River
I. araguaiaensis	43603	97506	21082	149.132	Araguaia River
I. araguaiaensis	43646	96311	21503	143.78	Araguaia River
I. araguaiaensis	43212	113366	20820	165.208	Araguaia River
I. araguaiaensis	56989	95156	76713	208.14	Araguaia River
I. araguaiaensis	48314	90637	72448	187.59	Araguaia River
I. araguaiaensis	44320	84157	20923		Araguaia River
I. araguaiaensis	35930	61648	23685	94.8225	Araguaia River
I. araguaiaensis	41275	73835	25782	142.637	Araguaia River
I. araguaiaensis	48143	92236	68644	132.89	Araguaia River
I. araguaiaensis	47608	91079	73470	166.667	Araguaia River
I. araguaiaensis	49000	92719	64485	164.327	Araguaia River
I. araguaiaensis	49499	92798	75142	160.165	Araguaia River
I. araguaiaensis	48779	92768	76260	218.68	Araguaia River
I. araguaiaensis	47044	101410	39803		Araguaia River
I. araguaiaensis	48819	39329	9457	90.2625	Araguaia River
I. araguaiaensis	48641	71689	20808	141.77	Araguaia River
I. araguaiaensis	47736	81199	10736	165.727	Araguaia River
I. araguaiaensis	46307	78582	11762	182.917	Araguaia River
I. araguaiaensis	45021	76821	10612	87.9425	Araguaia River
I. araguaiaensis	44472	86792	10361	81.7425	Araguaia River
I. araguaiaensis	56154	36141	8768	61.435	Araguaia River
I. araguaiaensis	55912	86731	8784	58.115	Araguaia River
I. araguaiaensis	42980	73476	10285	57.7325	Araguaia River
I. araguaiaensis	55473	48226	8489	49.2	Araguaia River
I. araguaiaensis	42566	46825	10504	40.84	Araguaia River
I. araguaiaensis	42401	47067	11174	34.865	Araguaia River
I. araguaiaensis	42130	47520	10713	35.495	Araguaia River
I. araguaiaensis	42216	57284	11123	37.04	Araguaia River
I. araguaiaensis	41684	47145	10564	38.175	Araguaia River
I. araguaiaensis	42024	58466	11286	39.635	Araguaia River
I. araguaiaensis	42253	45149	10965	36.865	Araguaia River
I. araguaiaensis	41828	47607	10831	35.82	Araguaia River
I. araguaiaensis	41822	45593	10836	34.375	Araguaia River
I. araguaiaensis	41653	46919	11310	33.3975	Araguaia River
I. araguaiaensis	41487	58574	11094	32.715	Araguaia River
I. araguaiaensis	41214	45050	10544	33.575	Araguaia River
I. araguaiaensis	41731	46729	10947	31.8425	Araguaia River
I. araguaiaensis	41535	45905	11233	37.3175	Araguaia River
I. araguaiaensis	41211	45746	11150	45.1675	Araguaia River
I. araguaiaensis	41170	46855	10990	59.6025	Araguaia River
I. araguaiaensis	41149	45930	10643	97.89	Araguaia River
I. araguaiaensis	40817	47291	10974	140.338	Araguaia River
I. araguaiaensis	40364	38761	11398	145.317	Araguaia River
I. araguaiaensis	51572	36961	20880	203.157	Araguaia River
I. araguaiaensis	50344	36285	8868	228.28	Araguaia River
I. araguaiaensis	49368	35206	8566		Araguaia River
I. araguaiaensis	43067	95624	13800	53.88	Araguaia River
I. araguaiaensis	43366	95175	25623	93.065	Araguaia River
I. araguaiaensis	43918	94095	21762	170.167	Araguaia River
I. araguaiaensis	46160	90315	70776	189.625	Araguaia River
I. araguaiaensis	49462	94663	75100	143.08	Araguaia River
I. araguaiaensis	43605	97505	21080	149.132	Araguaia River
I. araguaiaensis	43645	96297	21510	143.78	Araguaia River
I. araguaiaensis	43214	113652	20823	165.208	Araguaia River
I. araguaiaensis	56985	95126	76701	208.14	Araguaia River
I. araguaiaensis	48312	90514	72451	187.59	Araguaia River
I. araguaiaensis	44322	84128	20931		Araguaia River
I. araguaiaensis	35934	61647	23676	94.8225	Araguaia River
I. araguaiaensis	41286	73838	25780	142.637	Araguaia River
I. araguaiaensis	48146	92227	68651	132.89	Araguaia River
I. araguaiaensis	47615	91188	73489	166.667	Araguaia River
I. araguaiaensis	49001	92727	64552	164.327	Araguaia River
I. araguaiaensis	49497	92795	75175	160.165	Araguaia River
I. araguaiaensis	48775	92678	76263	218.68	Araguaia River
I. araguaiaensis	47036	101398	39802		Araguaia River
I. araguaiaensis	36262	30431	8104	23.03	Araguaia River
I. araguaiaensis	36761	38628	24991	21.7275	Araguaia River
I. araguaiaensis	36813	47041	29160	20.3675	Araguaia River
I. araguaiaensis	47747	54586	31242	19.0575	Araguaia River
I. araguaiaensis	36673	56708	31785	18.365	Araguaia River
I. araguaiaensis	35967	52791	21543	18.08	Araguaia River
I. araguaiaensis	38922	52500	21611	17.9125	Araguaia River
I. araguaiaensis	41816	52914	21510	17.9325	Araguaia River
I. araguaiaensis	38654	76805	19782	18.375	Araguaia River
I. araguaiaensis	42758	77885	18356	17.495	Araguaia River
I. araguaiaensis	42130	78073	17758	17.79	Araguaia River
I. araguaiaensis	41679	79778	17202	18.92	Araguaia River
I. araguaiaensis	41102	78707	16148	19.705	Araguaia River
I. araguaiaensis	41014	79415	16782	21.7675	Araguaia River
I. araguaiaensis	40137	76766	16341	23.4475	Araguaia River
I. araguaiaensis	38908	76686	27769	25.3675	Araguaia River
I. araguaiaensis	38386	75190	25902	27.7125	Araguaia River
I. araguaiaensis	38538	90918	24621	28.7275	Araguaia River
I. araguaiaensis	37614	90945	24002	29.5375	Araguaia River
I. araguaiaensis	37541	95001	22595	30.905	Araguaia River
I. araguaiaensis	41727	98346	11011	30.9875	Araguaia River
I. araguaiaensis	42409	94283	12304	32.44	Araguaia River
I. araguaiaensis	43458	85085	19910	31.395	Araguaia River
I. araguaiaensis	44373	36986	21372	28.6625	Araguaia River
I. araguaiaensis	33675	35352	21334	27.2525	Araguaia River
I. araguaiaensis	34107	27282	11757	25.09	Araguaia River
I. araguaiaensis	33957	26222	9245	24.705	Araguaia River
I. araguaiaensis	34042	27379	9066	25.6525	Araguaia River
I. araguaiaensis	34963	28069	10872	26.54	Araguaia River
I. araguaiaensis	34915	36846	10581	26.34	Araguaia River
I. araguaiaensis	35165	62347	10403	25.03	Araguaia River
I. araguaiaensis	35609	83804	10219	24.7225	Araguaia River
I. araguaiaensis	35837	84818	10156	24.525	Araguaia River
I. araguaiaensis	36460	86819	10080	24.73	Araguaia River
I. araguaiaensis	37271	78673	10275	23.9425	Araguaia River
I. araguaiaensis	37942	80047	10418	22.9475	Araguaia River
I. araguaiaensis	38713	15931	10358	21.69	Araguaia River
I. araguaiaensis	39479	15864	10603	23.125	Araguaia River
I. araguaiaensis	40322	15954	10565	26.5925	Araguaia River
I. araguaiaensis	41376	15828	10770	39.0325	Araguaia River
I. araguaiaensis	42865	16244	10986		Araguaia River
I. araguaiaensis	47688	83564	31084	43.7125	Araguaia River
I. araguaiaensis	45610	88742	32631	41.36	Araguaia River
I. araguaiaensis	39749	65984	32825	40.0075	Araguaia River
I. araguaiaensis	39293	62008	33621	45.64	Araguaia River
I. araguaiaensis	39823	58056	37506	45.475	Araguaia River
I. araguaiaensis	47206	110676	74256	48.7125	Araguaia River
I. araguaiaensis	49425	118186	72016	42.8025	Araguaia River
I. araguaiaensis	45382	114570	47257	38.95	Araguaia River
I. araguaiaensis	44439	46563	27332	36.96	Araguaia River
I. araguaiaensis	46514	94199	44940	32.0475	Araguaia River
I. araguaiaensis	45925	44576	28033	31.8375	Araguaia River
I. araguaiaensis	47631	65639	27392	30.3225	Araguaia River
I. araguaiaensis	46951	67520	28878	29.6475	Araguaia River
I. araguaiaensis	48163	136273	34423	29.7775	Araguaia River
I. araguaiaensis	49458	79288	51099	30.65	Araguaia River
I. araguaiaensis	51369	80478	53695	31.875	Araguaia River
I. araguaiaensis	52267	130738	53333	30.065	Araguaia River
I. araguaiaensis	53443	76897	54312	24.555	Araguaia River
I. araguaiaensis	54267	76725	55130	23.5075	Araguaia River
I. araguaiaensis	54978	77779	51638	36.075	Araguaia River
I. araguaiaensis	57070	85349	50016	37.075	Araguaia River
I. araguaiaensis	46197	91915	43172	27.98	Araguaia River
I. araguaiaensis	45664	86727	35048	34.2725	Araguaia River
I. araguaiaensis	47666	88382	35167	30	Araguaia River
I. araguaiaensis	44618	88159	28296	41.455	Araguaia River
I. araguaiaensis	41380	85758	27552	91.89	Araguaia River
I. araguaiaensis	40555	85540	29629	23.8025	Araguaia River
I. araguaiaensis	41241	87129	33163	22.0675	Araguaia River
I. araguaiaensis	41345	87488	32369	26.68	Araguaia River
I. araguaiaensis	41332	86435	34132	27.2375	Araguaia River
I. araguaiaensis	41198	89934	33763	211.295	Araguaia River
I. araguaiaensis	42169	89211	27540	33.5625	Araguaia River
I. araguaiaensis	39523	81701	37674	35.9375	Araguaia River
I. araguaiaensis	44121	95640	39834	9.6775	Araguaia River
I. araguaiaensis	51364	82920	48372	28.4025	Araguaia River
I. araguaiaensis	44012	93555	45613	23.545	Araguaia River
I. araguaiaensis	50536	83027	66590	25.2575	Araguaia River
I. araguaiaensis	37404	84002	18689	24.8875	Araguaia River
I. araguaiaensis	79862	104732	61778	36.5525	Araguaia River
I. araguaiaensis	40214	76335	27037	11.1175	Araguaia River
I. araguaiaensis	79335	125428	60432	45.1325	Araguaia River
I. araguaiaensis	76564	125323	66369	15.16	Araguaia River
I. araguaiaensis	40002	80160	22459	24.5625	Araguaia River
I. araguaiaensis	37993	42702	24585	4.3475	Araguaia River
I. araguaiaensis	63782	130049	68735	24.3325	Araguaia River
I. araguaiaensis	39149	82781	16406	25.0825	Araguaia River
I. araguaiaensis	38660	77748	27603	2.535	Araguaia River
I. araguaiaensis	51028	127408	69643	12.8075	Araguaia River
I. araguaiaensis	39770	67544	17603	12.3025	Araguaia River
I. araguaiaensis	38559	79486	30491	25.43	Araguaia River
I. araguaiaensis	39016	79810	32564	12.7925	Araguaia River
I. araguaiaensis	39204	44865	15787	11.345	Araguaia River
I. araguaiaensis	38790	81206	37158	21.6625	Araguaia River
I. araguaiaensis	39465	78422	38431	10.91	Araguaia River
I. araguaiaensis	50498	93035	45412	9.2925	Araguaia River
I. araguaiaensis	38859	81409	38789	2.2875	Araguaia River
I. araguaiaensis	39890	50689	19396	16.8875	Araguaia River
I. araguaiaensis	39193	76876	36582	19.1525	Araguaia River
I. araguaiaensis	39422	65117	31776	4.97	Araguaia River
I. araguaiaensis	39757	71417	21752	10.1275	Araguaia River
I. araguaiaensis	50345	132056	53268	3.0025	Araguaia River
I. araguaiaensis	39373	55433	26951	18.17	Araguaia River
I. araguaiaensis	37831	47583	22434	2.3675	Araguaia River
I. araguaiaensis	39567	77457	19726	31.7825	Araguaia River
I. araguaiaensis	40141	83332	20029	3.89	Araguaia River
I. araguaiaensis	40225	77476	48320	29.165	Araguaia River
I. araguaiaensis	38382	25160	11871	15.7325	Araguaia River
I. araguaiaensis	40855	66446	37281	15.125	Araguaia River
I. araguaiaensis	40514	71792	18438	31.2025	Araguaia River
I. araguaiaensis	39574	92448	34931	29.395	Araguaia River
I. araguaiaensis	39858	76012	21526	27.265	Araguaia River
I. araguaiaensis	39539	73009	20858	7.55	Araguaia River
I. araguaiaensis	85740	92359	22117	17.4675	Araguaia River
I. araguaiaensis	36176	21233	12850	24.9275	Araguaia River
I. araguaiaensis	38368	41714	13636	9.9675	Araguaia River
I. araguaiaensis	91942	119656	74742	16.435	Araguaia River
I. araguaiaensis	39076	46499	15197	27.7125	Araguaia River
I. araguaiaensis	32983	61100	15987	4.77	Araguaia River
I. araguaiaensis	95321	109405	73654	24.2325	Araguaia River
I. araguaiaensis	33028	59665	10921	28.3075	Araguaia River
I. araguaiaensis	33144	46441	11159	4.605	Araguaia River
I. araguaiaensis	72830	94398	69363	24.8175	Araguaia River
I. araguaiaensis	39046	72421	22198	34.3925	Araguaia River
I. araguaiaensis	39941	79899	24955	3.66	Araguaia River
I. araguaiaensis	82852	92849	65880	32.46	Araguaia River
I. araguaiaensis	39887	83290	28256	28.285	Araguaia River
I. araguaiaensis	89150	90705	68547	11.3125	Araguaia River
I. araguaiaensis	40159	84491	28279	37.32	Araguaia River
I. araguaiaensis	38043	43254	24308	2.945	Araguaia River
I. araguaiaensis	90903	94067	75019	19.9125	Araguaia River
I. araguaiaensis	38361	44318	25164	17.18	Araguaia River
I. araguaiaensis	40384	83195	30846	5.61	Araguaia River
I. araguaiaensis	57485	117347	79347	37.9525	Araguaia River
I. araguaiaensis	40610	82503	29250	7.38	Araguaia River
I. araguaiaensis	59057	94672	77534	18.6875	Araguaia River
I. araguaiaensis	37827	74371	26116	19.8575	Araguaia River
I. araguaiaensis	37819	78974	25756	6.87	Araguaia River
I. araguaiaensis	60568	93112	55060	14.2825	Araguaia River
I. araguaiaensis	37948	68464	25359	23.7875	Araguaia River
I. araguaiaensis	40485	78043	26987	2.8675	Araguaia River
I. araguaiaensis	60775	101969	51708	39.865	Araguaia River
I. araguaiaensis	34976	47187	21416	4.2225	Araguaia River
I. araguaiaensis	40010	70136	25160	17.8125	Araguaia River
I. araguaiaensis	36437	44408	17617	16.5925	Araguaia River
I. araguaiaensis	52575	57143	40844	3.5575	Araguaia River
I. araguaiaensis	43572	36903	11372	19.77	Araguaia River
I. araguaiaensis	36486	53356	21048	17.975	Araguaia River
I. araguaiaensis	36511	46459	22422	2.4875	Araguaia River
I. araguaiaensis	40149	54010	23361	17.195	Araguaia River
I. araguaiaensis	36811	48056	24917	18.39	Araguaia River
I. araguaiaensis	40067	52912	21615	16.38	Araguaia River
I. araguaiaensis	37824	56235	31663	18.15	Araguaia River
I. araguaiaensis	38090	56036	32251	3.2575	Araguaia River
I. araguaiaensis	40455	93760	26411	16.01	Araguaia River
I. araguaiaensis	37742	56961	28906	14.74	Araguaia River
I. araguaiaensis	39574	46344	19646	4.3	Araguaia River
I. araguaiaensis	37047	57115	22192	11.15	Araguaia River
I. araguaiaensis	49010	89770	22369	8.195	Araguaia River
I. araguaiaensis	36547	61593	19533	7.8525	Araguaia River
I. araguaiaensis	38927	43988	17502	10.93	Araguaia River
I. araguaiaensis	38305	70799	28653	19.295	Araguaia River
I. araguaiaensis	40192	35373	16742	8.61	Araguaia River
I. araguaiaensis	40326	83977	19088	9.67	Araguaia River
I. araguaiaensis	36946	78175	14843	18.98	Araguaia River
I. araguaiaensis	36983	81308	14390	19.2425	Araguaia River
I. araguaiaensis	36811	83187	16521	19.605	Araguaia River
I. araguaiaensis	38643	137061	33745	11.5525	Araguaia River
I. araguaiaensis	43822	90520	75667	9.06	Araguaia River
I. araguaiaensis	38480	160280	35216	20.525	Araguaia River
I. araguaiaensis	38620	159226	36638	20.015	Araguaia River
I. araguaiaensis	38493	159492	38646	19.53	Araguaia River
I. araguaiaensis	38604	159716	40073	19.45	Araguaia River
I. araguaiaensis	39040	160186	41657	19.0375	Araguaia River
I. araguaiaensis	39641	158038	39106	18.1	Araguaia River
I. araguaiaensis	38821	354930	40721	19.9725	Araguaia River
I. araguaiaensis	38855	171446	44497	19.645	Araguaia River
I. araguaiaensis	39153	160259	43663	20.4	Araguaia River
I. araguaiaensis	39240	160849	42070	20.895	Araguaia River
I. araguaiaensis	39423	160092	41893	21.8075	Araguaia River
I. araguaiaensis	39520	99908	41014	21.72	Araguaia River
I. araguaiaensis	39703	97647	40700	22.7825	Araguaia River
I. araguaiaensis	40023	97805	40721	22.48	Araguaia River
I. araguaiaensis	39256	99381	42036	22.75	Araguaia River
I. araguaiaensis	39137	100443	42810	23.41	Araguaia River
I. araguaiaensis	39607	104687	44474	23.61	Araguaia River
I. araguaiaensis	39217	134945	49767	26.6825	Araguaia River
I. araguaiaensis	39079	126947	80298	26.76	Araguaia River
I. araguaiaensis	39630	126042	82073	26.2025	Araguaia River
I. araguaiaensis	39352	124891	82713	24.37	Araguaia River
I. araguaiaensis	39433	123434	83496	23.0525	Araguaia River
I. araguaiaensis	38919	121560	83846	22.2025	Araguaia River
I. araguaiaensis	39622	121985	84508	21.445	Araguaia River
I. araguaiaensis	39705	121921	84288	21.1225	Araguaia River
I. araguaiaensis	39943	121733	84125	21.46	Araguaia River
I. araguaiaensis	51913	124948	83685	21.48	Araguaia River
I. araguaiaensis	50580	141509	83851	22.0725	Araguaia River
I. araguaiaensis	50703	131121	83804	23.685	Araguaia River
I. araguaiaensis	53056	143285	84162	25.5575	Araguaia River
I. araguaiaensis	51556	138877	84465	26.7875	Araguaia River
I. araguaiaensis	39536	140031	84698	28.175	Araguaia River
I. araguaiaensis	39538	123628	84122	28.5925	Araguaia River
I. araguaiaensis	39639	121679	83518	28.6275	Araguaia River
I. araguaiaensis	39667	124894	82742	29.3525	Araguaia River
I. araguaiaensis	39319	99815	81458	27.1825	Araguaia River
I. araguaiaensis	39503	97532	78883	25.38	Araguaia River
I. araguaiaensis	39072	96295	60111	26.23	Araguaia River
I. araguaiaensis	39050	114711	41310	26.585	Araguaia River
I. araguaiaensis	38443	82145	35183	27.9	Araguaia River
I. araguaiaensis	38136	65762	29072		Araguaia River
I. araguaiaensis	54937	80560	23524	17.915	Araguaia River
I. araguaiaensis	53378	77679	21255	17.5925	Araguaia River
I. araguaiaensis	51020	74778	29521	16.9525	Araguaia River
I. araguaiaensis	47282	78740	29772	16.895	Araguaia River
I. araguaiaensis	44845	70597	24568	17.16	Araguaia River
I. araguaiaensis	43247	64500	23084		Araguaia River
I. araguaiaensis	41407	33981	23926	19.7125	Araguaia River
I. araguaiaensis	39693	32673	20770	19.8575	Araguaia River
I. araguaiaensis	39106	31330	19588	20.8375	Araguaia River
I. araguaiaensis	38348	30553	19104	22.5375	Araguaia River
I. araguaiaensis	37627	35636	18209	24.315	Araguaia River
I. araguaiaensis	37561	36108	21566	26.9175	Araguaia River
I. araguaiaensis	44410	34882	25057	26.845	Araguaia River
I. araguaiaensis	42937	34095	22274	28.065	Araguaia River
I. araguaiaensis	40497	32602	21700	28.0575	Araguaia River
I. araguaiaensis	38894	34176	24407	27.8975	Araguaia River
I. araguaiaensis	45886	41192	27871		Araguaia River
I. araguaiaensis	34981	89128	15792	20.7425	Araguaia River
I. araguaiaensis	35548	87435	14031	21.1675	Araguaia River
I. araguaiaensis	36489	43534	13726	21.0425	Araguaia River
I. araguaiaensis	37042	47322	13877	20.0175	Araguaia River
I. araguaiaensis	37468	46082	14383	20.655	Araguaia River
I. araguaiaensis	37658	79421	17221	20.76	Araguaia River
I. araguaiaensis	37938	90796	31508	19.9675	Araguaia River
I. araguaiaensis	38371	91275	31390	19.61	Araguaia River
I. araguaiaensis	42491	89794	30820	19.7175	Araguaia River
I. araguaiaensis	43658	87550	29961	20.7025	Araguaia River
I. araguaiaensis	43928	83553	29562	20.6925	Araguaia River
I. araguaiaensis	44343	68452	29377	22.405	Araguaia River
I. araguaiaensis	43963	67632	29184	23.53	Araguaia River
I. araguaiaensis	43297	65081	29983	25.4225	Araguaia River
I. araguaiaensis	42596	59888	31591	27.3175	Araguaia River
I. araguaiaensis	34081	51468	20192	28.065	Araguaia River
I. araguaiaensis	40979	88254	42756	31.2775	Araguaia River
I. araguaiaensis	41649	90715	43036	34.4475	Araguaia River
I. araguaiaensis	41766	95438	44744	36.585	Araguaia River
I. araguaiaensis	42356	97349	41986	35.435	Araguaia River
I. araguaiaensis	43007	106262	50252	34.18	Araguaia River
I. araguaiaensis	42172	107492	53017	29.5025	Araguaia River
I. araguaiaensis	42886	107118	58573	33.9975	Araguaia River
I. araguaiaensis	44606	109376	64031	34.0925	Araguaia River
I. araguaiaensis	41957	106073	65692	29.085	Araguaia River
I. araguaiaensis	37132	52429	14978	9.81	Araguaia River
I. araguaiaensis	41699	97036	61331	14.3675	Araguaia River
I. araguaiaensis	37768	51840	15756	19.91	Araguaia River
I. araguaiaensis	42557	93741	44998	5.5175	Araguaia River
I. araguaiaensis	37658	58554	16644	24.3975	Araguaia River
I. araguaiaensis	43364	92527	38148	21.6675	Araguaia River
I. araguaiaensis	37674	63622	38108	11.68	Araguaia River
I. araguaiaensis	32692	58812	15003	9.8225	Araguaia River
I. araguaiaensis	37501	64519	38044	19.59	Araguaia River
I. araguaiaensis	42906	95214	37285	2.04	Araguaia River
I. araguaiaensis	37306	103199	37184	20.1425	Araguaia River
I. araguaiaensis	37497	104565	37768	9.97	Araguaia River
I. araguaiaensis	35647	50586	13584	11.3825	Araguaia River
I. araguaiaensis	37406	104112	36840	20.5025	Araguaia River
I. araguaiaensis	37587	85357	35609	2.855	Araguaia River
I. araguaiaensis	35589	49561	30064	18.42	Araguaia River
I. araguaiaensis	37861	82942	31277	17.745	Araguaia River
I. araguaiaensis	43018	49412	22215	2.805	Araguaia River
I. araguaiaensis	37654	80976	27014	22.4875	Araguaia River
I. araguaiaensis	37460	78557	23899	21.9425	Araguaia River
I. araguaiaensis	37101	76477	22304	5.6475	Araguaia River
I. araguaiaensis	42215	53366	16802	15.9975	Araguaia River
I. araguaiaensis	36852	70807	21311	23.0525	Araguaia River
I. araguaiaensis	36940	65857	21431	24.22	Araguaia River
I. araguaiaensis	39597	61704	21058	25.765	Araguaia River
I. araguaiaensis	41056	54336	18911	24.0375	Araguaia River
I. araguaiaensis	40693	51708	27032	23.49	Araguaia River
I. araguaiaensis	39684	47756	25815	22.215	Araguaia River
I. araguaiaensis	38751	63582	14423	21.05	Araguaia River
I. araguaiaensis	37892	60944	12731	20.27	Araguaia River
I. araguaiaensis	37414	60309	12844	200.042	Araguaia River
I. araguaiaensis	39807	44964	19950	19.74	Araguaia River
I. araguaiaensis	38012	39898	18401		Araguaia River
I. araguaiaensis	38828	142159	79765	34.135	Araguaia River
I. araguaiaensis	50640	151005	62667	35.9775	Araguaia River
I. araguaiaensis	52425	142551	84938	35.7075	Araguaia River
I. araguaiaensis	51449	140584	82071	35.8075	Araguaia River
I. araguaiaensis	43546	81686	11369	36.225	Araguaia River
I. araguaiaensis	43131	90934	11398	33.7825	Araguaia River
I. araguaiaensis	43041	97580	11680	29.835	Araguaia River
I. araguaiaensis	42600	123896	28368	9.4075	Araguaia River
I. araguaiaensis	42271	133303	29618	5.3675	Araguaia River
I. araguaiaensis	41934	46900	19834	24.4175	Araguaia River
I. araguaiaensis	41383	44253	19236	5.1	Araguaia River
I. araguaiaensis	51481	172406	62716	19.93	Araguaia River
I. araguaiaensis	41902	46882	19975	13.77	Araguaia River
I. araguaiaensis	50407	155251	62054	9.6225	Araguaia River
I. araguaiaensis	42634	47211	21158	25.1175	Araguaia River
I. araguaiaensis	42321	47735	22281	2.22	Araguaia River
I. araguaiaensis	54059	97002	14332	21.885	Araguaia River
I. araguaiaensis	41929	48956	23519	7.1025	Araguaia River
I. araguaiaensis	50927	147811	83149	21.205	Araguaia River
I. araguaiaensis	41316	47840	22725	5.2325	Araguaia River
I. araguaiaensis	51518	151331	72550	20.83	Araguaia River
I. araguaiaensis	42241	49627	24094	5.31	Araguaia River
I. araguaiaensis	52214	159588	82588	26.0975	Araguaia River
I. araguaiaensis	41836	49502	23318	2.3925	Araguaia River
I. araguaiaensis	52116	161276	82097	28.6725	Araguaia River
I. araguaiaensis	42596	55138	25991	4.7725	Araguaia River
I. araguaiaensis	51921	168251	81721	31.7475	Araguaia River
I. araguaiaensis	42821	61484	26685	8.8025	Araguaia River
I. araguaiaensis	50739	149869	74318	25.3775	Araguaia River
I. araguaiaensis	42130	67638	28485	16.5325	Araguaia River
I. araguaiaensis	51849	140021	77052	14.5275	Araguaia River
I. araguaiaensis	42045	75202	29290	23.275	Araguaia River
I. araguaiaensis	51609	139625	72307	7.9675	Araguaia River
I. araguaiaensis	42334	81338	36900	32.225	Araguaia River
I. araguaiaensis	52391	137256	54562	30.9275	Araguaia River
I. araguaiaensis	43037	90372	65639	7.49	Araguaia River
I. araguaiaensis	51451	118407	52348	20.2825	Araguaia River
I. araguaiaensis	42599	94169	67161	22.9025	Araguaia River
I. araguaiaensis	51869	122168	50931	3.9625	Araguaia River
I. araguaiaensis	43677	97522	68516	27.0625	Araguaia River
I. araguaiaensis	42894	99457	67578	13.8225	Araguaia River
I. araguaiaensis	50759	91663	40311	13.1925	Araguaia River
I. araguaiaensis	43168	101318	65325	24.945	Araguaia River
I. araguaiaensis	42053	98633	54180	25.7275	Araguaia River
I. araguaiaensis	41516	98367	51864	24.7675	Araguaia River
I. araguaiaensis	41217	92681	45813	25.3425	Araguaia River
I. araguaiaensis	41605	87598	30481	26.68	Araguaia River
I. araguaiaensis	41889	90775	36810	29.1225	Araguaia River
I. araguaiaensis	41393	92002	43303	29.965	Araguaia River
I. araguaiaensis	41995	92231	44262	32.1275	Araguaia River
I. araguaiaensis	43289	92013	42245	31.48	Araguaia River
I. araguaiaensis	43142	94737	46418	29.5175	Araguaia River
I. araguaiaensis	42805	94243	46863	30.5625	Araguaia River
I. araguaiaensis	42579	90745	55255	20.035	Araguaia River
I. araguaiaensis	36598	56170	36698	10.39	Araguaia River
I. araguaiaensis	43490	52735	18196	6.795	Araguaia River
I. araguaiaensis	36933	58081	37703	18.0325	Araguaia River
I. araguaiaensis	37655	58799	38227	19.345	Araguaia River
I. araguaiaensis	37620	58412	37692	3.7825	Araguaia River
I. araguaiaensis	41788	66540	15260	16.74	Araguaia River
I. araguaiaensis	37684	59424	20725	6.755	Araguaia River
I. araguaiaensis	56532	77835	26113	15.54	Araguaia River
I. araguaiaensis	37543	59214	21024	7.0775	Araguaia River
I. araguaiaensis	56914	79696	45962	15.9125	Araguaia River
I. araguaiaensis	37380	59699	21182	6.64	Araguaia River
I. araguaiaensis	56879	79452	46765	16.135	Araguaia River
I. araguaiaensis	37316	61589	21420	3.0625	Araguaia River
I. araguaiaensis	42934	76958	45741	18.765	Araguaia River
I. araguaiaensis	37753	63698	21631	17.58	Araguaia River
I. araguaiaensis	43697	59308	30635	3.98	Araguaia River
I. araguaiaensis	38169	90308	21523	14.345	Araguaia River
I. araguaiaensis	43894	72695	30313	10.6175	Araguaia River
I. araguaiaensis	37256	80167	23136	8.295	Araguaia River
I. araguaiaensis	45355	78247	28794	15.0925	Araguaia River
I. araguaiaensis	37343	79874	24604	5.605	Araguaia River
I. araguaiaensis	45265	70331	28582	18.3375	Araguaia River
I. araguaiaensis	37212	81415	24398	5.5075	Araguaia River
I. araguaiaensis	44452	67615	33346	21.2875	Araguaia River
I. araguaiaensis	37119	84397	21822	3.1225	Araguaia River
I. araguaiaensis	41158	60884	44597	22.68	Araguaia River
I. araguaiaensis	38545	53524	28561	23.2225	Araguaia River
I. araguaiaensis	61281	60219	22974	2.365	Araguaia River
I. araguaiaensis	36950	53705	29220	20.2975	Araguaia River
I. araguaiaensis	37307	19290	12356	3.295	Araguaia River
I. araguaiaensis	37239	54736	29883	23.3475	Araguaia River
I. araguaiaensis	36408	52941	28862	21.885	Araguaia River
I. araguaiaensis	36499	54466	21872	23.0225	Araguaia River
I. araguaiaensis	36584	56399	23030	23.405	Araguaia River
I. araguaiaensis	36442	57868	21646	20.91	Araguaia River
I. araguaiaensis	36387	59255	20587	20.87	Araguaia River
I. araguaiaensis	36354	53803	20672	21.6375	Araguaia River
I. araguaiaensis	36811	53106	20971	19.8475	Araguaia River
I. araguaiaensis	36774	51749	19853	18.07	Araguaia River
I. araguaiaensis	37200	50327	18617	21.7275	Araguaia River
I. araguaiaensis	37598	47621	17313	19.825	Araguaia River
I. araguaiaensis	37537	48261	18191	22.22	Araguaia River
I. araguaiaensis	37259	49933	19519	20.72	Araguaia River
I. araguaiaensis	37059	40750	18200	25.7575	Araguaia River
I. araguaiaensis	37180	40471	20972	25.075	Araguaia River
I. araguaiaensis	37389	40631	21034	24.935	Araguaia River
I. araguaiaensis	37214	42656	21940	23.72	Araguaia River
I. araguaiaensis	37252	45883	22397	24.01	Araguaia River
I. araguaiaensis	37679	50720	22692	26.0175	Araguaia River
I. araguaiaensis	37930	55540	24613	25.3225	Araguaia River
I. araguaiaensis	38224	66430	23730	24.6825	Araguaia River
I. araguaiaensis	38484	71924	22686	29.2025	Araguaia River
I. araguaiaensis	39887	77060	23071	32.5875	Araguaia River
I. araguaiaensis	37163	77417	22372	34.4825	Araguaia River
I. araguaiaensis	40738	86979	55130	40.355	Araguaia River
I. araguaiaensis	40443	138091	40771	28.1	Araguaia River
I. araguaiaensis	40609	135568	41307	25.32	Araguaia River
I. araguaiaensis	40175	87820	34409	24.575	Araguaia River
I. araguaiaensis	40671	87083	35660	4.88	Araguaia River
I. araguaiaensis	41174	60283	20584	19.6675	Araguaia River
I. araguaiaensis	39381	89151	33615	12.4725	Araguaia River
I. araguaiaensis	41289	66399	26004	30.7725	Araguaia River
I. araguaiaensis	41913	73451	32464	32.1075	Araguaia River
I. araguaiaensis	42078	82332	35093	34.96	Araguaia River
I. araguaiaensis	42651	90028	42779	31.9275	Araguaia River
I. araguaiaensis	51669	94958	63151	32.01	Araguaia River
I. araguaiaensis	43037	103063	70785	29.275	Araguaia River
I. araguaiaensis	53115	112242	70922	26.7725	Araguaia River
I. araguaiaensis	53714	114642	74642	23.395	Araguaia River
I. araguaiaensis	51502	109729	73364	21.805	Araguaia River
I. araguaiaensis	52529	110720	72711	19.345	Araguaia River
I. araguaiaensis	45975	105403	71483	15.46	Araguaia River
I. araguaiaensis	45456	101450	68622	16.995	Araguaia River
I. araguaiaensis	44925	99304	65656	18.17	Araguaia River
I. araguaiaensis	44233	89299	42260	19.9725	Araguaia River
I. araguaiaensis	43586	89361	39686	20.1675	Araguaia River
I. araguaiaensis	43334	87126	34744	20.955	Araguaia River
I. araguaiaensis	43169	87682	34179	19.96	Araguaia River
I. araguaiaensis	43722	87475	33422	21.1475	Araguaia River
I. araguaiaensis	43438	87301	32304	19.84	Araguaia River
I. araguaiaensis	43336	87136	32650	18.82	Araguaia River
I. araguaiaensis	43227	85569	31722	17.7875	Araguaia River
I. araguaiaensis	43391	84955	30923	15.67	Araguaia River
I. araguaiaensis	42979	80732	30666	15.8275	Araguaia River
I. araguaiaensis	42811	73711	29541	13.345	Araguaia River
I. araguaiaensis	42445	60357	29142	13.7075	Araguaia River
I. araguaiaensis	42406	58428	28997	13.3575	Araguaia River
I. araguaiaensis	42502	53563	26764	13.34	Araguaia River
I. araguaiaensis	42274	54255	26511	68.9975	Araguaia River
I. araguaiaensis	43158	50195	26717	53.005	Araguaia River
I. g. geoffrensis	48455	95576	36750	98.175	Xingu River
I. g. geoffrensis	38346	61913	11195	29.8475	Xingu River
I. g. geoffrensis	40942	56081	12617		Xingu River
I. g. geoffrensis	90420	15622	10713	53.7575	Xingu River
I. g. geoffrensis	58552	19096	13243	164.835	Xingu River
I. g. geoffrensis	58740	71958	13139		Xingu River
I. g. geoffrensis	59444	19561	12529	49.9825	Xingu River
I. g. geoffrensis	59130	95040	31282	64.5425	Xingu River
I. g. geoffrensis	60441	91045	30985		Xingu River
I. g. geoffrensis	61354	95049	31711	49.9975	Xingu River
I. g. geoffrensis	52001	83377	25030	117.707	Xingu River
I. g. geoffrensis	51537	85181	23789		Xingu River
I. g. geoffrensis	35756	28963	9588	56.6525	Xingu River
I. g. geoffrensis	51917	74274	25424	76.765	Xingu River
I. g. geoffrensis	53109	106737	35000	190.697	Xingu River
I. g. geoffrensis	38924	45501	19028		Xingu River
I. g. geoffrensis	54628	91661	15733	54.52	Xingu River
I. g. geoffrensis	41807	34520	9851	86.355	Xingu River
I. g. geoffrensis	42042	34484	9539	134.37	Xingu River
I. g. geoffrensis	42334	38322	9494		Xingu River
I. g. geoffrensis	42202	39191	9529	58.5275	Xingu River
I. g. geoffrensis	43373	34471	9182	48.685	Xingu River
I. g. geoffrensis	78488	32240	8854	50.8825	Xingu River
I. g. geoffrensis	43444	34687	8976	45.7075	Xingu River
I. g. geoffrensis	49601	91831	18112	29.3275	Xingu River
I. g. geoffrensis	51861	55999	9408	23.9	Xingu River
I. g. geoffrensis	52203	59755	8865	21.9575	Xingu River
I. g. geoffrensis	40828	58562	21226	24.19	Xingu River
I. g. geoffrensis	52068	58516	22210	35.265	Xingu River
I. g. geoffrensis	51098	59747	20616		Xingu River
I. g. geoffrensis	52230	91661	12731		Xingu River
I. g. geoffrensis	35660	61062	20481		Xingu River
I. g. geoffrensis	50837	26019	10885		Xingu River
I. g. geoffrensis	51677	34128	15555		Xingu River
I. g. geoffrensis	41977	44811	10419		Xingu River
I. g. geoffrensis	42327	82340	9100		Xingu River
I. g. geoffrensis	52765	66807	14468		Xingu River
I. g. geoffrensis	52853	67786	15994		Xingu River
I. g. geoffrensis	52378	67534	15563		Xingu River
I. g. geoffrensis	53252	67848	14966		Xingu River
I. g. geoffrensis	52963	68651	16872		Xingu River
I. g. geoffrensis	53021	68028	15790		Xingu River
I. g. geoffrensis	53115	69233	16005		Xingu River
I. g. geoffrensis	52908	83043	15659		Xingu River
I. g. geoffrensis	34670	49300	9285		Xingu River
I. g. geoffrensis	53469	78639	16382		Xingu River
I. g. geoffrensis	52560	87018	17182		Xingu River
I. g. geoffrensis	53719	82304	17620		Xingu River
I. g. geoffrensis	54178	83572	17006		Xingu River
I. g. geoffrensis	54614	75284	27457		Xingu River
I. g. geoffrensis	54920	90152	18584		Xingu River
I. g. geoffrensis	57385	42698	12415		Xingu River
I. g. geoffrensis	59034	18755	12355	30.3	Xingu River
I. g. geoffrensis	39891	39251	13024	46.1925	Xingu River
I. g. geoffrensis	40054	53407	16251	34.98	Xingu River
I. g. geoffrensis	42094	77904	17742	71.9975	Xingu River
I. g. geoffrensis	39536	95174	18186		Xingu River
I. g. geoffrensis	61021	101694	11694	52.3875	Xingu River
I. g. geoffrensis	10576	14932	11619	76.6825	Xingu River
I. g. geoffrensis	38287	75919	11276	46.285	Xingu River
I. g. geoffrensis	58243	59127	20366	54.3675	Xingu River
I. g. geoffrensis	58210	68467	15624		Xingu River
I. g. geoffrensis	74958	141408	18536	46.2175	Xingu River
I. g. geoffrensis	47748	80308	21360	59.9375	Xingu River
I. g. geoffrensis	41466	76319	11405	85.4075	Xingu River
I. g. geoffrensis	42558	90439	16012	103.95	Xingu River
I. g. geoffrensis	84752	80943	14350	166.875	Xingu River
I. g. geoffrensis	49507	82989	20981	138.018	Xingu River
I. g. geoffrensis	51040	91761	23690		Xingu River
I. g. geoffrensis	50801	33412	23789	23.745	Xingu River
I. g. geoffrensis	51976	40788	11103	29.8	Xingu River
I. g. geoffrensis	52460	17049	10910	39.35	Xingu River
I. g. geoffrensis	52304	16091	10658	97.24	Xingu River
I. g. geoffrensis	52632	16188	9701	142.415	Xingu River
I. g. geoffrensis	38926	38501	9900	49.4925	Xingu River
I. g. geoffrensis	39286	62821	12185	71.41	Xingu River
I. g. geoffrensis	62359	92087	21436	81.86	Xingu River
I. g. geoffrensis	61298	90682	20074	65.3	Xingu River
I. g. geoffrensis	61643	92656	18300	121.08	Xingu River
I. g. geoffrensis	51459	33516	16138	86.2825	Xingu River
I. g. geoffrensis	51521	86688	26292	69.0125	Xingu River
I. g. geoffrensis	59752	105781	18477	56.12	Xingu River
I. g. geoffrensis	59850	93753	19298	50.69	Xingu River
I. g. geoffrensis	51478	70123	20231	48.055	Xingu River
I. g. geoffrensis	60117	104846	19049	56.3825	Xingu River
I. g. geoffrensis	52248	74538	26912	76.23	Xingu River
I. g. geoffrensis	58937	97001	19904	155.768	Xingu River
I. g. geoffrensis	60087	94781	20255		Xingu River
I. g. geoffrensis	59031	102192	19316	15.05	Xingu River
I. g. geoffrensis	61180	29035	16749	47.6375	Xingu River
I. g. geoffrensis	39613	31977	12537	34.2225	Xingu River
I. g. geoffrensis	41107	89335	19975		Xingu River
I. g. geoffrensis	39395	30205	12413	88.5525	Xingu River
I. g. geoffrensis	49657	85392	8901	188.887	Xingu River
I. g. geoffrensis	63265	61307	12818		Xingu River
I. g. geoffrensis	52085	48355	15214	33.0325	Xingu River
I. g. geoffrensis	51050	22378	14503	46.56	Xingu River
I. g. geoffrensis	49958	42787	7109		Xingu River
I. g. geoffrensis	50222	22650	13253	49.9275	Xingu River
I. g. geoffrensis	45304	77434	18297	82.42	Xingu River
I. g. geoffrensis	38704	47375	9200		Xingu River
I. g. geoffrensis	71368	41474	22695	106.87	Xingu River
I. g. geoffrensis	40776	23367	10560	128.782	Xingu River
I. g. geoffrensis	50930	74597	9025		Xingu River
I. g. geoffrensis	50399	74089	16219	60.05	Xingu River
I. g. geoffrensis	41605	14310	9757	93.2875	Xingu River
I. g. geoffrensis	41768	13588	8509	196.03	Xingu River
I. g. geoffrensis	41353	50647	8403		Xingu River
I. g. geoffrensis	40489	81654	8399	104.465	Xingu River
I. g. geoffrensis	46642	27034	9533	141.585	Xingu River
I. g. geoffrensis	39542	93385	11877		Xingu River
I. g. geoffrensis	40303	59967	9502	56.9775	Xingu River
I. g. geoffrensis	42458	13343	9036	70.1575	Xingu River
I. g. geoffrensis	40194	63721	8171		Xingu River
I. g. geoffrensis	40440	17364	8139	62.2025	Xingu River
I. g. geoffrensis	40346	93147	8139	35.14	Xingu River
I. g. geoffrensis	40409	17921	8183		Xingu River
I. g. geoffrensis	40815	20491	8476	53.11	Xingu River
I. g. geoffrensis	53359	40509	8416	61.075	Xingu River
I. g. geoffrensis	39430	87747	8107	67.7275	Xingu River
I. g. geoffrensis	39550	16852	8025		Xingu River
I. g. geoffrensis	41630	37196	9621	77.975	Xingu River
I. g. geoffrensis	61619	76875	20930	139.863	Xingu River
I. g. geoffrensis	61501	69369	21013	144.44	Xingu River
I. g. geoffrensis	53831	41061	9692	86.265	Xingu River
I. g. geoffrensis	40688	25303	10182	57.975	Xingu River
I. g. geoffrensis	87788	90468	28936	50.9975	Xingu River
I. g. geoffrensis	61182	101801	20705	58.945	Xingu River
I. g. geoffrensis	61334	103946	20809		Xingu River
I. g. geoffrensis	60987	104426	20922		Xingu River
I. g. geoffrensis	68663	115656	36400	33.8125	Xingu River
I. g. geoffrensis	87725	79274	36978	36.715	Xingu River
I. g. geoffrensis	64354	111240	34616		Xingu River
I. g. geoffrensis	62655	74927	35111	27.6	Xingu River
I. g. geoffrensis	49471	83596	37641	45.87	Xingu River
I. g. geoffrensis	41782	74922	38260	39.9975	Xingu River
I. g. geoffrensis	41244	97509	39747	44.795	Xingu River
I. g. geoffrensis	42115	70826	40049	61.435	Xingu River
I. g. geoffrensis	41175	71790	23140	93.9575	Xingu River
I. g. geoffrensis	40087	29446	9926	188.173	Xingu River
I. g. geoffrensis	41603	30377	18599	182.002	Xingu River
I. g. geoffrensis	41284	53167	11853	33.3925	Xingu River
I. g. geoffrensis	40006	104254	73665	27.9425	Xingu River
I. g. geoffrensis	47307	98481	20675	27.095	Xingu River
I. g. geoffrensis	42049	105150	20886	28.6	Xingu River
I. g. geoffrensis	42763	105258	52481	32.0625	Xingu River
I. g. geoffrensis	43257	96982	19306	46.325	Xingu River
I. g. geoffrensis	40662	109375	20015	56.2275	Xingu River
I. g. geoffrensis	42036	88709	20158	60.37	Xingu River
I. g. geoffrensis	44097	103861	58081	55.2925	Xingu River
I. g. geoffrensis	42526	94899	35671	52.6425	Xingu River
I. g. geoffrensis	43196	93549	34804	55.6525	Xingu River
I. g. geoffrensis	42276	81692	34617	55.075	Xingu River
I. g. geoffrensis	41173	75560	31781	60.2775	Xingu River
I. g. geoffrensis	40351	72372	30297	53.8175	Xingu River
I. g. geoffrensis	40421	51166	12442		Xingu River
I. g. geoffrensis	40635	60775	13713	30.785	Xingu River
I. g. geoffrensis	38700	42157	22159	43.2675	Xingu River
I. g. geoffrensis	49097	67966	22805	47.41	Xingu River
I. g. geoffrensis	38819	70356	22513	53.42	Xingu River
I. g. geoffrensis	43241	39807	12534	61.3825	Xingu River
I. g. geoffrensis	41247	32495	9710		Xingu River
I. g. geoffrensis	46012	60378	8663	50.11	Xingu River
I. g. geoffrensis	39255	73328	12672	64.7575	Xingu River
I. g. geoffrensis	40599	79198	17617	117.373	Xingu River
I. g. geoffrensis	40671	80619	18106		Xingu River
I. g. geoffrensis	41598	84816	22576	40.0925	Xingu River
I. g. geoffrensis	69251	116834	10095	62.9525	Xingu River
I. g. geoffrensis	69317	112981	10477		Xingu River
I. g. geoffrensis	68972	96922	10838	41.6	Xingu River
I. g. geoffrensis	67589	108556	11511	39.8325	Xingu River
I. g. geoffrensis	67420	100030	12746	45.9825	Xingu River
I. g. geoffrensis	67560	108602	45270	63.53	Xingu River
I. g. geoffrensis	100459	102419	9482	64.8725	Xingu River
I. g. geoffrensis	88169	50474	21163		Xingu River
I. g. geoffrensis	47165	28911	11150	23.3525	Xingu River
I. g. geoffrensis	42368	11083	7461	34.1375	Xingu River
I. g. geoffrensis	38710	50746	13384	84.4825	Xingu River
I. g. geoffrensis	39562	50840	22104	197.722	Xingu River
I. g. geoffrensis	49026	53177	19411		Xingu River
I. g. geoffrensis	41150	35274	10650	41.8175	Xingu River
I. g. geoffrensis	81408	91361	9899	86.0125	Xingu River
I. g. geoffrensis	50376	28552	9103		Xingu River
I. g. geoffrensis	83464	77569	8279	92.73	Xingu River
I. g. geoffrensis	74023	96986	27517	60.995	Xingu River
I. g. geoffrensis	41402	97730	9676	58.11	Xingu River
I. g. geoffrensis	76127	97861	30268	50.8125	Xingu River
I. g. geoffrensis	76932	100716	22255	55.4	Xingu River
I. g. geoffrensis	77544	75616	51754		Xingu River
I. g. geoffrensis	77463	72129	17678	121.493	Xingu River
I. g. geoffrensis	37881	57530	38288	45.3625	Xingu River
I. g. geoffrensis	34638	48578	17369	43.51	Xingu River
I. g. geoffrensis	37036	58470	17504	44.8175	Xingu River
I. g. geoffrensis	35394	54389	29633	41.0625	Xingu River
I. g. geoffrensis	37170	52083	27803	39.905	Xingu River
I. g. geoffrensis	40274	54822	30967	41.295	Xingu River
I. g. geoffrensis	39149	64338	31675	40.9325	Xingu River
I. g. geoffrensis	53935	84629	36103	45.45	Xingu River
I. g. geoffrensis	44027	89357	47862	43.1025	Xingu River
I. g. geoffrensis	54521	92512	62138	44.3025	Xingu River
I. g. geoffrensis	49342	89221	69693	48.5125	Xingu River
I. g. geoffrensis	68840	86930	74516	49.6025	Xingu River
I. g. geoffrensis	48667	87028	73361	49.7225	Xingu River
I. g. geoffrensis	70423	94453	75916	51.8775	Xingu River
I. g. geoffrensis	48545	86685	75032	50.32	Xingu River
I. g. geoffrensis	37505	100833	49453	54.795	Xingu River
I. g. geoffrensis	46615	97427	42539	51.12	Xingu River
I. g. geoffrensis	45695	85673	35617	51.35	Xingu River
I. g. geoffrensis	44406	95839	35928	54.2175	Xingu River
I. g. geoffrensis	45388	85569	34310	53.34	Xingu River
I. g. geoffrensis	44028	90006	33175	59.2275	Xingu River
I. g. geoffrensis	44393	79272	28605	59.5775	Xingu River
I. g. geoffrensis	46264	71716	28555	67.2525	Xingu River
I. g. geoffrensis	44353	73782	23412	75.3075	Xingu River
I. g. geoffrensis	36992	67547	22028	91.16	Xingu River
I. g. geoffrensis	36671	61086	12814	174.107	Xingu River
I. g. geoffrensis	37420	63564	11763	144.782	Xingu River
I. g. geoffrensis	47602	69376	37108	52.535	Xingu River
I. g. geoffrensis	56603	89277	66526	44.555	Xingu River
I. g. geoffrensis	54097	95302	68025	46.0575	Xingu River
I. g. geoffrensis	56354	91677	42138	77.8375	Xingu River
I. g. geoffrensis	55942	91505	33222	35.0975	Xingu River
I. g. geoffrensis	46244	85259	33744	36.6425	Xingu River
I. g. geoffrensis	55568	85107	34617		Xingu River
I. g. geoffrensis	46351	72861	34926	34.705	Xingu River
I. g. geoffrensis	36602	31914	16491	60.9475	Xingu River
I. g. geoffrensis	36403	63566	20940	83.955	Xingu River
I. g. geoffrensis	36646	63694	18286	67.265	Xingu River
I. g. geoffrensis	37131	78110	19787	66.4575	Xingu River
I. g. geoffrensis	36835	82996	38973	55.4575	Xingu River
I. g. geoffrensis	40440	51566	23467	44.2575	Xingu River
I. g. geoffrensis	37582	52911	26367	42.245	Xingu River
I. g. geoffrensis	37442	42027	26774	40.685	Xingu River
I. g. geoffrensis	45290	41453	19981	39.835	Xingu River
I. g. geoffrensis	37577	46011	23831	44.58	Xingu River
I. g. geoffrensis	37165	44852	24486	50.88	Xingu River
I. g. geoffrensis	37135	38675	19767	55.335	Xingu River
I. g. geoffrensis	37025	42603	19645	50.7575	Xingu River
I. g. geoffrensis	38100	36647	16118	44.075	Xingu River
I. g. geoffrensis	37911	42656	13804	42.03	Xingu River
I. g. geoffrensis	38310	46015	13328	45.5525	Xingu River
I. g. geoffrensis	37684	39062	11125	45.8725	Xingu River
I. g. geoffrensis	37567	37563	13188	53.3175	Xingu River
I. g. geoffrensis	37117	38837	11211	53.13	Xingu River
I. g. geoffrensis	36254	55739	19211	49.6725	Xingu River
I. g. geoffrensis	37162	48751	25237	52.6475	Xingu River
I. g. geoffrensis	36372	61180	23183	50.5075	Xingu River
I. g. geoffrensis	37230	65435	21917	44.595	Xingu River
I. g. geoffrensis	37304	46644	20318	41.8125	Xingu River
I. g. geoffrensis	37602	56117	13679	37.2675	Xingu River
I. g. geoffrensis	37618	46543	13126	38.5575	Xingu River
I. g. geoffrensis	36106	37594	10089	40.09	Xingu River
I. g. geoffrensis	35750	43249	10429	63.8	Xingu River
I. g. geoffrensis	37258	42455	13278		Xingu River
I. g. geoffrensis	36398	31122	11163	101.582	Xingu River
I. g. geoffrensis	43654	74317	29605	106.463	Xingu River
I. g. geoffrensis	56639	72326	44287	95.5575	Xingu River
I. g. geoffrensis	35896	42687	19132	56.4625	Xingu River
I. g. geoffrensis	40921	75604	28891	41.7175	Xingu River
I. g. geoffrensis	48327	72925	28849	48.75	Xingu River
I. g. geoffrensis	48898	70102	29491	43.5875	Xingu River
I. g. geoffrensis	46961	64186	33275	41.64	Xingu River
I. g. geoffrensis	34873	64778	27724	46.045	Xingu River
I. g. geoffrensis	36358	56935	26838	48.32	Xingu River
I. g. geoffrensis	36934	50020	22503	43.7375	Xingu River
I. g. geoffrensis	38909	51216	19360	48.1675	Xingu River
I. g. geoffrensis	43593	39198	17921	51.625	Xingu River
I. g. geoffrensis	45505	35491	20108	53.8875	Xingu River
I. g. geoffrensis	45237	35945	23643	61.1125	Xingu River
I. g. geoffrensis	45698	39363	21010	61.9125	Xingu River
I. g. geoffrensis	53465	55258	25788	71.9275	Xingu River
I. g. geoffrensis	55067	44939	28249	113.203	Xingu River
I. g. geoffrensis	54954	54773	26957		Xingu River
I. g. geoffrensis	42244	57689	39466	72.855	Xingu River
I. g. geoffrensis	35787	42571	11620	61.0425	Xingu River
I. g. geoffrensis	36450	49272	16420	49.8075	Xingu River
I. g. geoffrensis	36926	71312	28548	43.07	Xingu River
I. g. geoffrensis	36767	78000	27925	38.6475	Xingu River
I. g. geoffrensis	36797	76343	23047	45.0125	Xingu River
I. g. geoffrensis	36775	75247	22154	43.9475	Xingu River
I. g. geoffrensis	37951	65618	22784	42.8125	Xingu River
I. g. geoffrensis	36585	59809	18934	37.5275	Xingu River
I. g. geoffrensis	36339	49718	11646	35.8	Xingu River
I. g. geoffrensis	36797	37082	13346	43.4575	Xingu River
I. g. geoffrensis	36881	36615	11565	46.88	Xingu River
I. g. geoffrensis	37532	37970	11092	48.22	Xingu River
I. g. geoffrensis	38112	44338	22753	45.8825	Xingu River
I. g. geoffrensis	37574	52288	23954	42.985	Xingu River
I. g. geoffrensis	34965	55997	19747	136.312	Xingu River
I. g. geoffrensis	37553	43005	20840	50.6575	Xingu River
I. g. geoffrensis	36492	22630	9951	44.8125	Xingu River
I. g. geoffrensis	36233	33230	10314	40.095	Xingu River
I. g. geoffrensis	36605	34122	10537	41.4575	Xingu River
I. g. geoffrensis	36251	31721	16912	43.635	Xingu River
I. g. geoffrensis	36320	37461	15690	40.74	Xingu River
I. g. geoffrensis	36192	32693	15480	39.2825	Xingu River
I. g. geoffrensis	36245	31397	11129	37.3125	Xingu River
I. g. geoffrensis	36023	33069	11856	33.41	Xingu River
I. g. geoffrensis	35543	33801	10608	30.6225	Xingu River
I. g. geoffrensis	35575	33463	14143	31.1425	Xingu River
I. g. geoffrensis	35252	43576	11405	27.1575	Xingu River
I. g. geoffrensis	35470	34132	11665	32.78	Xingu River
I. g. geoffrensis	35532	30737	9880		Xingu River
I. g. geoffrensis	36236	35175	12165		Xingu River
I. g. geoffrensis	39277	55891	25347		Xingu River
I. g. geoffrensis	38119	80541	30669		Xingu River
I. g. geoffrensis	38660	91899	41406		Xingu River
I. g. geoffrensis	40694	98130	44356		Xingu River
I. g. geoffrensis	38950	87426	46698		Xingu River
I. g. geoffrensis	38070	82165	32262		Xingu River
I. g. geoffrensis	40053	57751	27007		Xingu River
I. g. geoffrensis	35378	43653	18750		Xingu River
I. g. geoffrensis	36824	43964	17215		Xingu River
I. g. geoffrensis	36439	41079	12539		Xingu River
I. g. geoffrensis	36011	32658	12805		Xingu River
I. g. geoffrensis	35716	43462	11826		Xingu River
I. g. geoffrensis	36208	36942	17461		Xingu River
I. g. geoffrensis	35316	30274	12490		Xingu River
I. g. geoffrensis	39696	89223	21644		Xingu River
I. g. geoffrensis	40186	96614	23377		Xingu River
I. g. geoffrensis	40168	66371	25928		Xingu River
I. g. geoffrensis	41916	63100	24478		Xingu River
I. g. geoffrensis	42852	77340	28438		Xingu River
I. g. geoffrensis	40205	69166	26498		Xingu River
I. g. geoffrensis	40923	68735	26769		Xingu River
I. g. geoffrensis	40370	71779	27901		Xingu River
I. g. geoffrensis	44903	58449	31089		Xingu River
I. g. geoffrensis	39059	79459	31688		Xingu River
I. g. geoffrensis	47039	64816	33009		Xingu River
I. g. geoffrensis	48295	76824	33903		Xingu River
I. g. geoffrensis	50263	94615	31069		Xingu River
I. g. geoffrensis	52501	98357	46088		Xingu River
I. g. geoffrensis	50403	93293	48645		Xingu River
I. g. geoffrensis	50379	95296	45195		Xingu River
I. g. geoffrensis	62893	95152	50210		Xingu River
I. g. geoffrensis	47917	96956	50432		Xingu River
I. g. geoffrensis	47124	86852	48547		Xingu River
I. g. geoffrensis	48685	56859	26123		Xingu River
I. g. geoffrensis	35534	45754	12791		Xingu River
I. g. geoffrensis	47432	59288	23948		Xingu River
I. g. geoffrensis	36048	46907	12632		Xingu River
I. g. geoffrensis	47323	66746	30588		Xingu River
I. g. geoffrensis	35838	43327	11846		Xingu River
I. g. geoffrensis	54474	89288	50129		Xingu River
I. g. geoffrensis	35578	47554	12409		Xingu River
I. g. geoffrensis	35200	66285	21872		Xingu River
I. g. geoffrensis	54053	96168	55963		Xingu River
I. g. geoffrensis	37106	56836	22002		Xingu River
I. g. geoffrensis	47311	100646	39912		Xingu River
I. g. geoffrensis	36390	54277	26055		Xingu River
I. g. geoffrensis	35955	76463	25009		Xingu River
I. g. geoffrensis	35999	87429	38511		Xingu River
I. g. geoffrensis	36227	97087	44985		Xingu River
I. g. geoffrensis	37973	108499	46413		Xingu River
I. g. geoffrensis	36106	106755	47493		Xingu River
I. g. geoffrensis	36632	92652	42933		Xingu River
I. g. geoffrensis	35957	50611	19607		Xingu River
I. g. geoffrensis	35383	45885	12836		Xingu River
I. g. geoffrensis	35551	33909	13434		Xingu River
I. g. geoffrensis	44736	58865	31286		Xingu River
I. g. geoffrensis	46412	62452	34076		Xingu River
I. g. geoffrensis	34350	73169	22316		Xingu River
[truncated: 3,851 more rows]
